# 1 Reshaping the *Hexagone*: the genetic landscape of modern

## 2 France

3

4 Simone Andrea Biagini<sup>1</sup>, Eva Ramos-Luis<sup>2,3</sup>, David Comas<sup>1</sup>, Francesc Calafell<sup>1\*</sup>

5

6 1. Departament de Ciències Experimentals i de la Salut, Institute of Evolutionary Biology (CSIC-UPF),  
7 Universitat Pompeu Fabra, Barcelona, Catalonia, Spain

8

9 2. Xenética Cardiovascular, Instituto de Investigación Sanitaria de Santiago de Compostela, Complejo  
10 Hospitalario Universitario de Santiago de Compostela, Santiago de Compostela, A Coruña, Spain.

11

12 3. Grupo de Medicina Xenómica, Universidade de Santiago de Compostela- Fundación Pública Galega de  
13 Medicina Xenómica, Santiago de Compostela, A Coruña, Spain.

14

15 \* Address correspondence to Francesc Calafell, [francesc.calafell@upf.edu](mailto:francesc.calafell@upf.edu), Departament de Ciències  
16 Experimentals i de la Salut, Institute of Evolutionary Biology (CSIC-UPF), Universitat Pompeu Fabra,  
17 Carrer Doctor Aiguader 88, 08005 Barcelona, Catalonia, Spain.

18

19

## 20 Abstract

21

22 Unlike other European countries, the human population genetics and demographic  
23 history of Metropolitan France is surprisingly understudied. In this work, we combined  
24 newly genotyped samples from various zones in France with publicly available data and  
25 applied both allele frequency and haplotype-based methods in order to describe the  
26 internal structure of this country, by using genome-wide single nucleotide  
27 polymorphism (SNP) array genotypes. We found out that French Basques are  
28 genetically distinct from all other populations in the *Hexagone* and that the populations  
29 from southwest France (namely the Gascony region) share a large proportion of their  
30 ancestry with Basques. Otherwise, the genetic makeup of the French population is  
31 relatively homogeneous and mostly related to Southern and Central European groups.  
32 However, a fine-grained, haplotype-based analysis revealed that Bretons slightly  
33 separated from the rest of the groups, due mostly to gene flow from the British Isles in a  
34 time frame that coincides both historically attested Celtic population movements to this  
35 area between the 3th and the 9th centuries CE, but also with a more ancient genetic  
36 continuity between Brittany and the British Isles related to the shared drift with hunter-  
37 gatherer populations. Haplotype-based methods also unveiled subtle internal structures  
38 and connections with the surrounding modern populations, particularly in the periphery  
39 of the *Hexagone*.

40

41

## 42 **Introduction**

43

44 Located in the center of Western Europe, Metropolitan France has historically acted as a  
45 bridge connecting Northern Europe to the Mediterranean and the Iberian spaces. The  
46 geographical position of France strongly affected the history of the settlement of the  
47 different parts of the territory, whose continuous fragmentation through time is attested  
48 by the large number of populations and cultures that settled this area. Greeks, Romans  
49 and Celtic tribes from central Europe shaped a first internal structure between the 6th  
50 and the 1st centuries BCE, while waves of barbarian invasions (Alamanni, Burgundians,  
51 Visigoths, Franks, and Celts) strongly impacted the population landscape of France  
52 during the 5th century CE<sup>1</sup>. During the 9th and 10th centuries CE, foreign invasions  
53 from all sides also influenced the territory: Muslims and Saracens from North Africa  
54 coming through Iberia, Hungarian Magyar from the east, and Vikings (*Northmen*) from  
55 the north<sup>1</sup>. Nowadays, France is a cosmopolitan country whose society is shaped by a  
56 plurality of lifestyles and truly different ethno-cultural diversity. Without any doubt,  
57 the impact of political refugees throughout the 20th century, or of the immigration  
58 from colonized countries to mainland France, such as the migration of Arabs and  
59 Berbers from Algeria which was the most extensive of all colonial migrations to  
60 Western Europe before the 1960s<sup>2</sup>, enriched the modern genetic landscape of the  
61 French territory. However, it is beyond our intention to explore this plethora of recent  
62 genetic contributions here, which can be quantified much more precisely with  
63 demographic analyses. Instead, we can apply genomic tools to excavate a deeper and  
64 ancient genetic background.

65 At the light of this complex past, the genetic landscape of France has been poorly  
66 analyzed, especially in recent times. The first studies with classical markers defined a  
67 general heterogeneous pattern considering different geographical arrangements such as  
68 military districts, historical provinces, and regions<sup>3,4</sup>. With his synthetic maps, Cavalli-  
69 Sforza proposed that this heterogeneity was a consequence of differential Neolithic  
70 influences between northern and southern France, and also pointed out a differentiation  
71 for Brittany and Gascony<sup>5</sup>. More recently, studies on mitochondrial DNA highlighted a  
72 general homogeneity when the samples were distributed among the 22 regions  
73 established in 1982 and historic provinces<sup>6,7</sup>. Generally, the mtDNA haplogroup

74 composition of French people did not differentiate neither internally, nor from the  
75 surrounding European genetic landscape<sup>6,7</sup>. On a microgeographical scale, Brittany  
76 showed affinity with Scandinavia and Britain, while French Basques stood out for a  
77 high frequency of haplogroup H, suggesting a link with the Neolithic diffusion in  
78 Europe<sup>6,7</sup>. In agreement with the homogeneity described by mtDNA studies, the Y-  
79 chromosome diversity strongly pointed out a lack of differentiation between the distinct  
80 groups when samples were organized on a regional scale. Even in this case, Brittany  
81 represented an exception, showing a lower Y-chromosome diversity that was interpreted  
82 as consequence of a possible founder effect, plus an isolation process<sup>8</sup>. Based on  
83 autosomal variants, a genome-wide study on Western France did not find any  
84 differentiation among the distinct groups organized on a regional geographical  
85 distribution<sup>9</sup>. Even in this case, the only outlier was Brittany, whose higher linkage  
86 disequilibrium suggested a lower effective population size, thus supporting the  
87 hypothesis of isolation inferred by the outcomes of the Y-chromosome analyses.  
88 Furthermore, in agreement with mitochondrial studies, Bretons were found to be  
89 admixed with individuals from the British Isles<sup>9</sup>. In this work, we present a  
90 comprehensive genome-wide study on France, using both allele frequency and  
91 haplotype-based methods, to determine the minimal meaningful geographic unit of  
92 genetic differentiation within France, describe the geogenetical landscape patterns  
93 within France, and trace the historic and ancient sources of gene flow into the  
94 *Hexagone*.

95

## 96 **Material and Methods**

97

### 98 **Dataset arrangement and genotypes**

99

100 In this study, informed consent was obtained from 331 individuals from different  
101 French departments. Internal Review Board approval for this work was granted by  
102 CEIC-PSMAR ref. 2016/6723/I. These samples were compiled by the Institute of  
103 Forensic Sciences, University of Santiago de Compostela, and most of them were first  
104 reported in an analysis of Y-chromosome markers in ref.<sup>8</sup>. As specified in the latter  
105 work, all the subjects and their parents were born in mainland France and bore a French  
106 surname. DNA was extracted from blood samples as described in Ramos-Luis *et al.*<sup>8</sup>. A

107 total of four Axiom ® Genome-Wide Human Origins Arrays (~629 K SNPs)<sup>10</sup> were  
108 genotyped at the Centro Nacional de Genotipado - Universidade de Santiago de  
109 Compostela facility. Genotype calling was performed running four different batches  
110 according to the Affymetrix Best Practices Workflow implemented in the software  
111 Axiom™ Analysis Suite 2.0. Out of 331 samples, 52 failed the genotyping process and  
112 a total of 279 samples were retained. Three additional samples were removed following  
113 an Identity-by-descent analysis (IBD) since they displayed a Proportion IBD value  $\geq$   
114 0.125 (minimum threshold for removing relatedness equal or higher than a third  
115 degree). Eventually, 276 samples were retained. To complete the French dataset, 79  
116 additional samples from a public source<sup>11</sup> and 60 from unpublished data (from an  
117 ongoing study on the Basque Country and the Franco-Cantabrian region; samples are  
118 subset from those in ref.<sup>12</sup>) were added to the original 276, leading to a total of 415  
119 samples. In a preliminary part of this work, 20 out of the 276 samples were identified as  
120 outliers and removed from the study (see Supplementary Figure 1 and caption). Thus,  
121 the complete dataset included 256 newly genotyped samples, plus 139 additional ones,  
122 for a final group of 395 samples (Dataset A) distributed among 20 different French  
123 departments (see Supplementary Figure 2 for the geographical distribution). For the  
124 allele frequency analyses, as comparison with external populations, a total of 333  
125 samples were added to Dataset A, forming Dataset B. This external group included 218  
126 samples among Germany, Norway, Spain, Italy, England, Ireland, and Scotland<sup>11</sup>,  
127 together with 107 samples from the Spanish autonomous communities of Catalonia,  
128 Valencian Community, and Balearic islands<sup>13</sup>, and 8 additional samples from South  
129 Italy (Naples) newly genotyped with Axiom ® Genome-Wide Human Origins Arrays  
130 (~629 K SNPs). Further 799 samples from external populations<sup>11</sup> were added to the  
131 previous ones when applying haplotype-based methods (Dataset C). Lastly, in the  
132 analysis with ancient data, 282 ancient samples<sup>11</sup> were added to the previous dataset,  
133 with the only exclusion of the 122 sub-Saharan African samples (Dataset D) since their  
134 presence would have reduced the resolution for the distribution of the rest of the  
135 samples in the PCA, masking signals of admixture in the dedicated analyses (see  
136 Supplementary Figure 3 for the geographical distribution of the modern samples from  
137 Datasets B and C, and Supplementary table 1 for a summary of the different dataset  
138 composition).

139

#### 140 **Data Quality Control**

141

142 Data were prepared using PLINK1.9<sup>14</sup>. Uniparental markers and X-chromosome  
143 variants were excluded. For the French dataset, a preliminary set of filters were applied  
144 to each group separately before the merging process. We filtered out all variants with  
145 missing call rates greater than 5%, those that failed Hardy-Weinberg test at  $p < 10^{-5}$ ,  
146 and samples with more than 10% missing genotype data. After merging, only variants  
147 common to the three datasets were retained and SNPs with a minor allele frequency  
148 (MAF) below 5% were excluded, resulting in a final 343,884 variants used for  
149 haplotype-based methods (Dataset A). For the analyses that needed a set of independent  
150 markers, SNPs were pruned setting a pairwise linkage disequilibrium maximum  
151 threshold of 0.5, a window of size 200 and a shift step of 25. Eventually, the pruned  
152 data retained 142,803 variants (Dataset A). In the analyses that included the external  
153 populations, only the pruned dataset, consisting in 154,889 SNPs, was used for the  
154 allele frequency analyses (Dataset B), while a set of 380,697 variants was retained in the  
155 haplotype-based methods (Dataset C). Regarding Dataset D, a set of 163,631 SNPs was  
156 retrieved after pruning (See Supplementary table 1 for a summary).

157

## 158 **Statistical analyses**

159

160 Eigenvectors were computed using the SmartPCA program in Eigenstrat software  
161 package (v. 13050)<sup>15</sup>. For Dataset D, we used the option `lsqproject:YES` when  
162 projecting ancient on top of the modern samples. Results were plotted in R (v 3.0.1).

163

164 The  $F_{ST}$  fixation index was computed using the SmartPCA tool (v. 13050) from the  
165 Eigenstrat software package. Results were produced in Rstudio<sup>16</sup> using R version 3.4.4  
166<sup>17</sup>. The  $F_{ST}$  matrix was used together with a geographic distance matrix produced with  
167 The Geographic Distance Matrix Generator (v. 1.2.3, available from  
168 [http://biodiversityinformatics.amnh.org/open\\_source/gdmg](http://biodiversityinformatics.amnh.org/open_source/gdmg)) in order to perform a  
169 Mantel test correlation using the `ade4`<sup>18</sup> library in R. Results were displayed using  
170 `ggplot2`<sup>19</sup> and `reshape`<sup>20</sup> libraries.

171

172 Based on different hierarchical levels (within Departments, Between Departments  
173 within Areas/Regions, Between Areas/Regions; see Supplementary Figure 4 for a visual  
174 representation of the used Areas and Regions), AMOVA was performed using the

175 *poppr.amova* function in R package *poppr* (v. 2.8.1)<sup>21,22</sup> and significance was tested  
176 with the *randtest* function implemented in R package *ade4*. For every percentage of  
177 variance, a p-value was calculated based on 1000 permutations.  
178 Patterns of population structure were explored, in both Dataset B and D, using  
179 ADMIXTURE<sup>23</sup> testing from K=2 to K=10 ancestral clusters and using 10 independent  
180 random seeds. Results were represented using the software *pong*<sup>24</sup>. For Dataset B,  
181 admixture was formally tested with f3 statistics computed using the *qp3Pop* function  
182 implemented in *Admixtools*<sup>10</sup>, while outgroup-f3 statistics were tested for Dataset D in  
183 the form of f3(Ancient, X; Mbuti), where 3 Mbuti samples from ref.<sup>11</sup> were added to  
184 Dataset D (1690 total samples, same variants as in Dataset D).

185

### 186 **EEMS (Estimated Effective Migration Surface)**

187

188 EEMS<sup>25</sup> analysis was run using Dataset A (142,803 variants from the pruned file).  
189 With a matrix of average pairwise genetic dissimilarities calculated using the internal  
190 program *bed2diffs*, a sample coordinates file, and a habitat coordinates file generated  
191 using Google Earth Pro (v. 7.3.2.5495), we performed 10 pilot runs of 6 million MCMC  
192 iterations each, with 3 million burn-in, and a thinning interval of 30,000. A second set  
193 of 5 runs was then performed restarting the chain with the highest likelihood with 4  
194 million MCMC iterations, 1 million burn-in, and thinning interval of 10,000. The  
195 density of the population grid was set to 300 demes, and random seeds were used for  
196 each one of the runs. We used the default hyperparameter values but tuned some of the  
197 proposed variances to improve convergence in the second set of runs. Results for the  
198 chain with the highest likelihood were displayed using *eems.plots* function in the R  
199 package *rEEMSplots*.

200

### 201 **Haplotype-based analysis**

202

203 Two different analyses were performed: one on the internal French population only  
204 (Dataset A), and one also including external populations (Dataset C). In both cases,  
205 phasing was performed using the software *Shapeit* (v. v2.r837)<sup>26,27</sup>. When running  
206 *ChromoPainter*<sup>28</sup>, all samples were used as both recipients and donors,<sup>28</sup> without any  
207 population specification (-a option) and not allowing self-copying. First, the parameters  
208 for the switch rate and global mutation probability were estimated with the EM

209 algorithm implemented in ChromoPainter using the parameters -i 15 -in -iM for  
210 chromosomes 1, 7, 14, and 20 for all the samples. This step allows to estimate the two  
211 parameters that will be then averaged for all chromosomes. The outcome for the average  
212 weighted values for the global mutation probability and the switch rate parameters were  
213 respectively 0.000745 and 266.67196 for Dataset A, and 0.000586 and 237.50784 for  
214 Dataset C. In a second step, ChromoPainter was run for all chromosomes using the two  
215 fixed parameters. Later, the final coancestry matrices for each chromosome were  
216 combined using the tool Chromocombine. The latter also estimates the C parameter  
217 which is needed for the normalization of the coancestry matrix data when we run  
218 fineSTRUCTURE in order to identify the population structure. The MCMC of  
219 fineSTRUCTURE was run using 1000000 burn-in iterations (flag -x), 2000000  
220 iterations sampled (flag -y), and thinning interval of 10000 (flag -z). Eventually, the  
221 fineSTRUCTURE tree was estimated running three different seeds and using the flags -  
222 X -Y -m T that allow to build the sample relationship tree. In the analysis on Dataset C,  
223 the work was then divided in two phases. In the first one, ChromoPainter and  
224 fineSTRUCTURE were rerun, this time silencing France in order to define the external  
225 groups only. In the second phase, fineSTRUCTURE was rerun using the “force file”  
226 option (-F), using “continents” as donor groups (represented by the external groups  
227 defined in the first phase); -F is a function that allows to exclude the donor  
228 representation in the building tree phase and focus on the distribution of the recipient  
229 groups, represented by the French samples only. We then applied the non-negative-  
230 least-squares (nnls) function from GLOBETROTTER <sup>29</sup> in order to describe the  
231 ancestry profiles for the French groups we detected with the “force file” option. We  
232 then used GLOBETROTTER in order to describe admixture events, sources and dates.  
233 More details about the usage of GLOBETROTTER are reported in Supplementary note  
234 1.

235

## 236 **Results**

237

### 238 **Internal genetic structure in France**

239

240 In order to define the best geographical partitioning of genetic differentiation, a  
241 hierarchical analysis of molecular variance (AMOVA) was performed with areas or

242 regions as major grouping factors. We determined first the proportion of genetic  
243 variation partitioned among geographic areas, among departments within geographic  
244 areas, and within departments. We next tested the proportion of genetic variation  
245 partitioned among regions (considering the 13 regions established in 2016), among  
246 departments within regions, and within departments. A further AMOVA was performed  
247 only testing the proportion of genetic variation partitioned among and within  
248 departments. As shown in Table 1, in all cases the main contribution to the genetic  
249 variance was found at the lowest hierarchical level (variation within departments), while  
250 differences among regions resulted in a negative value that could be interpreted as zero,  
251 meaning absence of any structure at this level. Conversely, differences among areas  
252 displayed positive values, supporting the role of areas as more reliable grouping factors  
253 of genetic variations when considering wider sample distributions. Finally, the results  
254 for the variation between departments, also supported by significant p-values in all the  
255 AMOVA analyses, pointed to the fact that this level of stratification might be a better  
256 representation for the minimal unit of genetic differentiation. Based on these results,  
257 samples were distributed on the map according to the departmental locations  
258 (Supplementary Figure 2) and all the subsequent analyses considered this grouping  
259 factor, although, given their known cultural and genetic identity, we retained Basque-  
260 speakers as a separate group in the Pyrénées-Atlantiques department. A first Principal  
261 Component Analysis (PCA) showed two distinct groups separated along the first PC  
262 (Figure 1A): the Basque samples on the right part of the plot, against most of the rest of  
263 the samples on the left one, within which a structure cannot be defined. These two  
264 major groups are connected by a “bridge” of samples represented by non-Basque-  
265 speaking individuals from the Gascony region in the southwestern corner of France.  
266 When we averaged the eigenvalues for the first two PCs and represented the same PCA,  
267 together with standard deviation (SD) values for each group, no evident pattern could  
268 still be discerned beyond the separation of Basques and Gascons (Supplementary Figure  
269 5A). When we removed both Basque and Gascon samples from the analysis (Figure  
270 1B), the resulting PCA showed some internal pattern of differentiation, more clearly  
271 defined by the average PCA (Supplementary Figure 5B), in which samples from the  
272 departments belonging to the northwestern region of Brittany seem to form a cluster on  
273 the left part of the plot.

274

275 **Patterns of gene flow within France**



276

277 In the genetic variation computed with the  $F_{ST}$  analysis, a general homogeneous pattern  
278 was found, with fine scale values of differentiation between some departments. The  
279 southwestern samples (Basques and Gascons) showed the highest values of  
280 differentiation with the northwestern departments reaching scores between 0.008 and  
281 0.009 for the Basque-speaking samples, and between 0.004 and 0.006 for the non-  
282 Basque-speaking ones (Supplementary Figure 6A, left), followed by lower values of  
283 differentiation with the northern and northeastern departments. Without the  
284 southwestern samples, the main differentiation was recorded between the northwestern  
285 departments and the southeastern corner of the country, with a highest value of  
286 differentiation around 0.002 between the southeastern department of Bouches-du-Rhône  
287 (BdR) and the northwestern Breton department of Côtes-d'Armor (CdA)  
288 (Supplementary Figure 6B, left). Lower levels of differentiation were locally found  
289 among the departments in the northwest, and among those in the north together with the  
290 northeastern ones. A Multidimensional Scaling analysis (MDS) based on the  $F_{ST}$   
291 matrices clearly showed how the southwestern samples separate from the rest of the  
292 groups (Supplementary Figure 6A, right), and how the Breton departments do the same  
293 once the Gascon and Basque samples are removed (Supplementary Figure 6B, right). A  
294 Mantel test of isolation by distance (IBD) between the  $F_{ST}$  values and the geographical  
295 distances showed a positive and statistically supported correlation ( $R^2=0.332$ ,  $P=0.001$ )  
296 (Supplementary Figure 7A), moving to even more positive values when the  
297 southwestern samples were removed ( $R^2=0.432$ ,  $P=0.001$ ) (Supplementary Figure 7B).  
298 Next, we used the EEMS analysis, a method for visualizing genetic diversity patterns,  
299 and found that the resulting effective migration surface mirrors the outcomes of genetic  
300 differentiation detected by the  $F_{ST}$  analyses (Figure 2); a higher effective migration was  
301 locally found in northern, northeastern and northwestern France among departments  
302 belonging to the same geographical areas, while a major barrier was discovered along  
303 the western side of France.

304

### 305 **Haplotype sharing patterns within France**

306

307 Using haplotype-based methods (Dataset A), we looked for patterns of haplotype  
308 sharing, illustrating relations between departments. In this first step, cutting the  
309 fineSTRUCTURE tree at the very base, allowed us to describe a fine scale haplotype

310 sharing distribution on a departmental scale; the outcome is a picture of the haplotype  
311 configuration within France (Figure 3). The resulting map shows finer-grained detail:  
312 we can define at least four distinct groups, plus a more widespread component. In the  
313 southwestern corner, the Basque samples clearly separate from the Gascon ones. In the  
314 northwestern vertex, the Breton departments exhibit their very own haplotypic  
315 signature, in agreement with the lower level of differentiation detected with the  $F_{ST}$   
316 analysis and the higher internal effective migration rate detected with EEMS. The same  
317 was found for the northern and northeastern departments that display a clearly shared  
318 haplotypic configuration. The southwestern department of Haute-Garonne (HG) and the  
319 southeastern one of Bouches-du-Rhône (BdR) present higher frequencies for some local  
320 haplotypes that in other departments reached only lower frequencies. Otherwise, a more  
321 generally spread French haplotypic background is found on the north-south axis.

322

### 323 **Sources of gene flow into France**

324

325 When we added external sources from the surrounding populations (yellow dots in  
326 Supplementary Figure 3) to describe allele-based genomic components with  
327 ADMIXTURE (Figure 4), the configuration observed pointed to a general  
328 homogeneous picture. The only exception was represented by the samples belonging to  
329 the Breton departments whose configuration was more alike to that in the Irish, Scottish,  
330 and English groups. Moving through the different K ancestral components, this  
331 behavior clearly characterizes the northwestern departments, separating them from the  
332 rest of the French groups since the very first K ancestral components (Figure 4). Thus,  
333 we formally tested for admixture events using the  $f_3$ -statistics with the test groups being  
334 the different departments, and the external surrounding populations as sources. We only  
335 retained the negative  $f_3$  values for those departments represented at least by two  
336 individuals. Results are shown in Supplementary Table 2 were only significant Z-scores  
337  $< -3$  are reported, while results for those departments passing all the requested filters but  
338 with higher Z-score values are shown in Supplementary Table 3. Notably, in 9  
339 departments, a combination of sources that was highly significant was Ireland-Southern  
340 Italy.

341

342

### 343 **Haplotype sharing patterns with external sources**

344

345 Based on the haplotype sharing with external sources it was possible to redefine the  
346 French haplotype configuration. After merging the 395 French samples with the 1132  
347 external ones (Dataset C), we first defined the external groups by silencing France when  
348 rerunning ChromoPainter and fineSTRUCTURE. The result was represented by 35  
349 different external groups (Supplementary Figure 8a). Secondly, focusing on our target,  
350 we redefined the French internal clusters using the 35 external ones as “continents”  
351 when running fineSTRUCTURE (Supplementary Figure 8b). The 13 different clusters  
352 we found within France were then represented as separate maps (Figure 5); each map in  
353 the figure is a heatmap showing the number of samples falling in the different  
354 departments. Out of 13 groups, 10 satisfied the conditions of having at least 10  
355 individuals and a major geographical area with a number of subjects corresponding to  
356 more than 50% of the entire cluster. These conditions allowed us to name each cluster  
357 based on the fact that a specific area was more represented than others in terms of  
358 sample size. The exclusion of three clusters did not impact the analysis, since only  
359 8.35% of the French samples were then not included as target in the following analyses  
360 with GLOBETROTTER. As in the analysis described in the previous paragraph, even in  
361 this case France appeared to be organized in few major areas of interest. As shown in  
362 Figure 5, the Northwest presented two main groups (B1 and B2), the Southwest divided  
363 in Basque (Bas) and Gascon (G1 and G2) groups, the Northern (CN) and Northeastern  
364 (NE) areas, the Southeast (SE), and a central/southwestern part of France (CSW1 and  
365 SW). These ten main areas represented the targets for the GLOBETROTTER analysis  
366 that we used to describe the ancestry profiles, the admixture events, and their dates.

367

### 368 **Ancestry profiles and dating admixture events**

369

370 The results from the application of the nns algorithm are displayed in Figure 5; on both  
371 sides of each target the ancestry profiles are represented as doughnut charts (on the left  
372 the results from the NM analysis, on the right the ones for the M one). The different  
373 colors represent proportions of haplotype sharing with specific sources (only  
374 contributions above 2.5% are shown). In the NM analysis, it is possible to appreciate  
375 how the haplotype sharing with other French sources (brown color) represents the  
376 highest proportion for all the different targets. When masking the French component,  
377 more refined patterns of contributions from external sources are detected. With the only

378 exception of the southwestern targets (G1, G2, and Bas), the remaining ones show a  
379 higher contribution from north Italy and Great Britain. Apart from these common  
380 signal, it is possible to highlight contributions from those neighboring populations that  
381 are more geographically close to specific areas within the French territory. The  
382 southwestern targets (G1, G2, and Bas) received more from the Spanish side, the  
383 northwestern targets (B1 and B2) share more with the external cluster source named  
384 *Irish\_Scottish* (with a proportion of 23.91% and 18.32% for the B1 and B2 targets  
385 respectively), the northeastern target (NE) is more connected to the external cluster  
386 source representing central and eastern European countries (receiving 17.64% from the  
387 source we named *Central\_Eastern\_EU*), as also from the *NorthernEurope* cluster  
388 source (which contributes 7.35% and 5.78% to the NE and CN targets, respectively).  
389 The southeastern target (SE) is mostly connected to the Italian sources and other  
390 Mediterranean countries, and the central/southwestern target (CSW1) clearly received  
391 more from both Spain and Italy.

392

393 As explained in Supplementary note 1, GLOBETROTTER provided evidence of  
394 admixture for 8 out of 10 targets, and for 5 of them we could also describe the dates and  
395 the sources of admixture as shown in Supplementary Figure 9. For three targets  
396 GLOBETROTTER gave *one-date* as result, while for the remaining two *one-date-*  
397 *multiway* was detected. In each case, only one date of admixture was detected; for the  
398 *one-date* groups a single admixing couple of sources was described, while two couples  
399 of sources were presented in the case of *one-date-multiway*. For a better interpretation  
400 of the results, consider the caption from Supplementary Figure 9.

401

## 402 **Relations with ancient populations**

403

404 In the analysis with Dataset D, we first explored the position of France in the context of  
405 other modern populations, and then we focused on the relation with a set of ancient  
406 samples from different periods. In Supplementary Figure 10, panel A shows the PCA  
407 with the modern samples; France (white circles) is located in a position that mirrors its  
408 geographical situation, in between British, Irish, Mediterranean, central and eastern  
409 European samples. In panel B, a set of ancient samples was projected into the modern  
410 genetic space. In this second PCA, most of the French individuals are close to the  
411 Steppe and the Late Neolithic Bronze Age (LNBA) European samples, with some

412 subjects connecting with the Anatolian Neolithic and the Early Neolithic European  
413 groups, and few others with the Europe Middle Neolithic and Chalcolithic  
414 (Europe\_MNChL) samples. Results from the ADMIXTURE analysis are reported for  
415 the lowest cross-validation error detected (K=4 in Supplementary Figure 11). At this  
416 level, four ancestral components are clearly visible: the hunter-gatherer (HG) ancestry  
417 (principally represented by the Scandinavian HG, in pink), Neolithic (mostly Anatolian  
418 and then European, in green), the Iran Neolithic (black), and Natufian (purple). Again,  
419 the proportion of these components in France is intermediate between those in Southern  
420 and Central European groups. It is especially the Natufian component that seems to act  
421 as a discriminant factor, not only inside France where it is virtually absent with few  
422 exceptions on the Mediterranean side, but mostly among the various modern groups.  
423 Outgroup f3-statistics in the form of  $f_3(\text{Ancient}, X; \text{Mbuti})$  allowed us to quantify for  
424 each X modern group the amount of shared drift with different ancient populations.  
425 Figure 6 shows the outcome for these statistics, with a focus on the shared drift with the  
426 three main European ancestral components: Western, Eastern, and Scandinavian hunter-  
427 gatherers, European Neolithic farmers, and the European Bronze Age steppe  
428 component. In most cases, French populations fit the expected pattern of distribution in  
429 the wider panorama of the European area. However, the European Neolithic component  
430 seems to be higher in the SW of France, while Brittany carries a proportion of HG  
431 ancestry that is higher than elsewhere in France but closer to the values in the British  
432 Isles.

433

434

435

436

## 437 **Discussion**

438

439 We have used both allele frequency and haplotype-based methods in order to describe  
440 the internal structure of pre-20th century Metropolitan France. While the first yielded a  
441 more homogeneous landscape, the latter unveiled patterns of local differentiation with  
442 some connections with the surrounding European populations. Furthermore, we  
443 explored patterns of genetic continuity with ancestral populations, contextualizing  
444 France in the wider European panorama. In previous works about France, samples were

445 differently arranged into the geographical space and no consensus had been reached on  
446 what subdivision was more appropriate; apart from the peculiar military districts <sup>3</sup>,  
447 historical provinces <sup>4,6</sup> and old regions <sup>8</sup> are the most used so far. Thus, our first goal  
448 was to search for the best geographical level of genetic stratification before arranging  
449 our samples on a map. After the French Revolution in 1790, in order to weaken the old  
450 loyalties, the ancient provinces of France were subdivided into departments, whose  
451 overall configuration has been mostly conserved so far <sup>30</sup>. Furthermore, in 1982, a  
452 system of 22 regions was established by grouping different departments into wider areas  
453 <sup>31</sup>. However, in 2016, the number of the regions was reduced to 13, with the consequent  
454 rearrangement of the departments <sup>32</sup>. Given this background, our AMOVA results  
455 provide evidence that regions, as a new internal reorganization, are not a suitable model  
456 for the genetic compartmentalization and point to the absence of any contribution to the  
457 total genetic variation, possibly implying that regions are separating genetically similar  
458 departments into different groups. On the other hand, departments, as result of a more  
459 conserved internal geographical structure, represent the best minimal unit of genetic  
460 stratification.

461

### 462 **Dissecting the *Hexagone***

463 Principal component analysis on allele frequencies revealed the expected Basque  
464 differentiation, adding Gascons in SW France as a population closely related to them,  
465 while the rest of France appeared relatively homogeneous. However, EEMS results  
466 pointed to the existence of other barriers to gene flow, particularly between NW France  
467 (Brittany) and the rest, while other areas acted as corridors, in central France and along  
468 the N and NE borders (Figure 2). It should not be excluded, though, that unsampled  
469 regions caused some possible artifacts <sup>33</sup>. It was with fineSTRUCTURE that we could  
470 really define a fine scale internal subdivision of France (Figure 3). A general  
471 widespread French haplotypic background moving through the north-south axis was  
472 detected; possibly the overall homogeneity found with the principal component analysis  
473 can be linked to the fact that, on an allele frequency scale, such widespread pattern may  
474 represent a confounding factor. Indeed, only the two Southwestern groups (Basques and  
475 Gascons) were not reached by this common French haplotypic background. Particular  
476 haplotype sharing patterns could also be observed along the north and northeast of  
477 France, in the southeast, and among the northwestern departments.

478

479 In order to understand whether these internal patterns of differentiation are due to recent  
480 events or whether they reflect a more ancient history, we relied on different analyses  
481 obtaining distinct information. On the one hand, we looked at the relation with modern  
482 external populations, exploring both allele-frequency (ADMIXTURE and f3-statistics)  
483 and haplotype-based methods (using GLOBETROTTER, we described the ancestry  
484 profiles for 10 different French targets, defined by the haplotype sharing with external  
485 sources, and provided a date of admixture events for 5 of them). On the other hand, we  
486 looked for the continuity between modern France and ancestral populations from  
487 different times.

488

### 489 **France, *carrefour* of Europe**

490 An ADMIXTURE plot (Figure 4), and a PCA with reference populations  
491 (Supplementary Figure 10A) place most French populations as similar to their  
492 geographic neighbours, namely the British Isles, Central Europe, Spain and Italy, in  
493 accordance with the general observation in Europe of geographic distance as the main  
494 predictor of genetic distance<sup>34,35</sup>. This may explain an apparently surprising outcome of  
495 our work: 9 out of 22 distinct targets in f3 statistics we tested against different external  
496 sources gave significant results with the lowest Z-scores detected for the same couple  
497 represented by the South Italian and Irish sources. Z-scores lower than -3 indicate that  
498 our test populations are admixed from sources not necessarily identical but related to the  
499 sources we used in the analysis<sup>11</sup>. Interestingly, these results found support in the  
500 outcome from the ancestry profiles we carried out with the Dataset C. The ancestry  
501 profiles described in Figure 5 are informative of differential migratory patterns<sup>36</sup> into  
502 each of the ten French genetic targets. The ancestry profiles are a way to describe the  
503 genome of each one of the ten French target as a mixture of the genomes from other  
504 groups, without inferring any particular admixture event<sup>37</sup>. With this analysis, each  
505 target is described as a composition of different proportions of haplotype sharing with  
506 other sources, excluding the contribution of the group that we want to explain (no self-  
507 copying allowed). Following the previous results from the f3-statistics, in the M  
508 analysis we found that 7 out of the 10 targets we tested were mostly described by high  
509 proportions of haplotype sharing with both Italy and the British Isles. Furthermore, the  
510 NM analysis highlighted the presence of a very strong shared French component,  
511 possibly reflecting the result of a higher intermixing between individuals from the  
512 different parts of modern France.

513

514 An additional dimension to the central genetic position of France in Western Europe is  
515 given by the comparison with a time transect of ancient samples. The ADMIXTURE  
516 results for dataset D (Supplementary Figure 11), as well as the projected PCA  
517 (Supplementary Figure 10B) place France again as intermediate between Southern and  
518 Central Europe. However, this pattern is locally nuanced, as discussed below. Thus, it  
519 appears that France has been operating as a crossroads for human migration in Western  
520 Europe since, at least, the Early Neolithic.

521

522

### 523 **Basques and Gascons**

524 These groups clearly differentiated from the rest of France both with allele frequency  
525 and with haplotype-based methods. It is interesting to notice that the presence of two  
526 distinct groups in the Southwestern region stressed the outcome of the isolation the  
527 Basque-speaking group experienced, splitting from their non-Basque-speaking  
528 neighbors from the very same department (PA and PAB groups). This finding is in  
529 agreement with their recognized distinct cultural entity<sup>38</sup> and their genetic outlier  
530 position in the European landscape<sup>39</sup>, as also with the lower internal levels of  
531 differentiation we detected with the  $F_{ST}$  analysis, and the low effective migration rates  
532 evidenced by EEMS, resulting in a barrier to migration in the southwestern corner of  
533 France.

534 The ancestry profile for French Basques (Figure 5) reflects an almost exclusive  
535 component from Spanish Basques, with some minor contribution from two other source  
536 clusters in the Iberian Peninsula. Quite often, Spanish populations are modelled as the  
537 result of a Basque background plus external admixture<sup>40</sup>, so it is not surprising that  
538 haplotypes found in Basques are also present in Spain. French and Spanish Basques, as  
539 well as other populations in NE Iberia, share also an increase in shared drift with Early  
540 Neolithic ancient samples (Figure 5D). The Basque singularity has often been explained  
541 as due to the persistence of an ancient gene pool, as old as the Late Glacial<sup>41</sup>, or as the  
542 Pre-Neolithic<sup>42</sup>, or as the Neolithic<sup>43</sup> (as our results seems to suggest), but a recent  
543 analysis of a large number of ancient Iberian samples<sup>44</sup> points to a more recent  
544 divergence, probably in the Iron Age, of the Basque population.

545



546 Gascons have been shown to be intermediate between French Basques and other French  
547 populations by PCA (Figure 1), and to carry a sizeable proportion of Basque ancestry  
548 (Figure 5). This could be the result of the postulated contraction of the Basque-speaking  
549 lands since the late Antiquity. Place names may indicate that Basque or languages  
550 similar to it may have been spoken in Aquitaine (SW France) south of the Garonne river  
551 <sup>45</sup>.

552

553

#### 554 **The Celtic connection**

555 As shown by EEMS (Figure 2), a barrier to gene flow delineates the northwestern  
556 corner of France, indicating the presence of another distinct group represented by the  
557 Breton departments. This group was firstly detected, on a coarser scale, with the  
558 removal of the Southwestern samples (Basques and Gascons) from the first PCA, and  
559 its outstanding position is in agreement with different studies on both uniparental and  
560 autosomal markers <sup>6-9</sup>. However, based on the fineSTRUCTURE results, in our work  
561 we detected a stronger evidence of differentiation based on haplotypic data.

562 ADMIXTURE showed a connection to the Irish samples (Figure 4), which is also  
563 indicated by the ancestry profiles of the B1 and B2 targets, which showed higher  
564 proportions for the *Irish\_Scottish* cluster source (Figure 5). The GLOBETROTTER  
565 analysis for determining the admixture dates pointed to some interesting results  
566 (Supplementary Figure 9). B2, the largest Breton target, gave signals of admixture  
567 around 700 CE, in the time frame of the British Celtic migrations (from Cornwall and  
568 south-west Britain) into Gaulish Armorica (then renamed Brittany) from the 3rd to 9th  
569 centuries CE, with a higher flow between the 5th and the 6th centuries CE <sup>46</sup>. This  
570 completely agrees with previous findings <sup>7-9</sup>. Historical migrations from Ireland to  
571 Brittany are well recorded since the 4th century CE <sup>47</sup>, as well as the emigration of Irish  
572 people during the War of Ireland (1641-1651) into the present day departments of  
573 Finistère (FI) and Côte d'Armor (CdA), within which a higher integration of the Irish  
574 immigrants is proved by records of marriage, birth and death certificates <sup>7</sup>. Furthermore,  
575 a Celtic root for the Breton language links the Breton departments to the Insular Celtic  
576 languages from the British Isles <sup>48</sup>.

577 Still, the connection may be more ancient. In Figure 6, we explore the three main  
578 European ancestral components <sup>49</sup>: the pre-Neolithic hunter-gatherers, the European  
579 Neolithic farmers, and the European Bronze Age steppe. Observing the shared drift with

580 the three hunter-gatherer groups (panels A, B, and C), it is possible to notice how the  
581 northwestern departments are mirroring the values shown by the British Isles, the  
582 Central-Eastern countries, and Northern Europe. Brittany is thus showing a signal of  
583 continuity with the British Isles which could be ascribed to a period older than the later  
584 Celtic migration. Always Brittany is acting as an outlier in the case of the shared drift  
585 with the Steppe Early and Middle Bronze Age group. In Figure 6 (panel E) it is possible  
586 to see how Brittany breaks the northeast-to-southwest decreasing gradient of shared  
587 drift. Even in this context, Brittany shows a continuity with the British Isles. Actually,  
588 this is consistent with the archaeological records and the development of a late  
589 Megalithic culture that characterized Ireland, Britain and Brittany in a period when  
590 other parts of Europe were experiencing the advent of metallurgy<sup>50</sup>.

591

### 592 **Borderlands**

593 The northeastern rim of France, and the Mediterranean southeastern region represent  
594 areas in the perimeter of the *Hexagone* that may have received particular genetic  
595 influences. In the ancestry profiles (Figure 5), the NE and SE targets exhibit the most  
596 complex genetic make-ups, with a diverse array of sources. The *Central\_Eastern\_EU*  
597 cluster source is mostly represented in the NE target, which includes the departments of  
598 Bas-Rhin and Moselle; this area recalls the long history of the Alsace-Lorraine territory:  
599 a fuzzy border between France and Germany for a long time, and only recently  
600 retroceded to France in 1945<sup>51</sup>.

601

602

603 The SE target (most abundant in the Bouches-du-Rhône department) copied from  
604 several Mediterranean sources (thus representing the target with more complexity). This  
605 area has been a corridor and a landing place for different Mediterranean peoples, since  
606 600 BCE when Greeks established a colony on the Mediterranean coastline of France in  
607 the city of Massalia (present-day Marseille)<sup>52</sup>. However, this Mediterranean connection  
608 may be older, since the late Epipaelolithic Natufian component (Supplementary Figure  
609 11), which is found almost exclusively in the Mediterranean populations, is found in  
610 France in the highest frequency in the Bouches-du-Rhône department.

611

612

### 613 **Conclusions**

614

615 In conclusion, according to our results, France is a genetic intermediate between  
616 Central, Eastern, and Northern Europe, with some influences from the Mediterranean  
617 countries on the southeastern coast. Analyses with both modern and ancient groups  
618 pointed to a clear separation of the southwestern groups (Basques and Gascons) and of  
619 Brittany from the rest of the French areas. The application of haplotype-based methods  
620 allowed us to look beyond the more homogeneous French haplotypic background,  
621 discovering connections with the neighbouring populations (e.g., French northeastern  
622 departments with central and eastern Europe), while analyses with ancestral populations  
623 strengthened the historical connection between Brittany and the British Isles.

624

## 625 **DATA AVAILABILITY**

626 The genotypes of the samples typed for this manuscript can be downloaded from  
627 [https://figshare.com/articles/France\\_Dataset/10008689](https://figshare.com/articles/France_Dataset/10008689)  
628 and [https://figshare.com/articles/Naples\\_Dataset/10008731](https://figshare.com/articles/Naples_Dataset/10008731)

629

## 630 **ACKNOWLEDGMENTS**

631 We thank Inés Quintela and the National Genotyping Center (CEGEN – USC) for their  
632 assistance in genotyping the samples. Of course, this work would not have been  
633 possible without the kind collaboration of all the sample donors. Funding was provided  
634 by the Agencia Estatal de Investigación and Fondo Europeo de Desarrollo Regional  
635 (FEDER) (grant CGL2016-75389-P), Agència de Gestió d’Ajuts Universitaris i de la  
636 Recerca (Generalitat de Catalunya) grant 2014 SGR 866, and “Unidad de Excelencia  
637 María de Maeztu”, funded by the MINECO (ref: MDM-2014-0370). SAB was  
638 supported by the Agencia Estatal de Investigación FPI grant BES-2014-069224.

639

## 640 **AUTHOR CONTRIBUTIONS**

641 SAB and FC designed the study; SAB carried out the analyses and interpretations,  
642 which were discussed with FC and DC; ERL and DC provided samples and unpublished  
643 genotypes. SAB wrote a first draft of the manuscript, with contributions from FC and  
644 DC. All authors read and approved the last version of the manuscript.

645

646

## 647 **References**

648

- 649 1. Haine, W. S. *The history of France*. (Greenwood Press, 2000).
- 650 2. MacMaster, N. *Colonial Migrants and Racism Algerians in France, 1900–62*.  
651 (Palgrave Macmillan, 1997).
- 652 3. Kherumian, R., Moullec, J. & Nguyen, V. C. Groupes sanguins érythrocytaires  
653 A $\square$ , A $\square$ , BO, MN, Rh (CcDE) et sériques, Hp, Tf, Gm dans quatre régions  
654 militaires françaises. *Bull. Mem. Soc. Anthropol. Paris* **1**, 377–384 (1967).
- 655 4. Cambon-Thomsen, A. & Ohayon, E. Practical Application of Population  
656 Genetics: The Genetic Survey “Provinces Françaises”. in *Advances in Forensic*  
657 *Haemogenetics. Advances in Forensic Haemogenetics, vol 2*. (ed. Mayr, W. R.)  
658 535–553 (1988).
- 659 5. Cavalli-Sforza, L. L., Menozzi, P. & Piazza, A. *The History and Geography of*  
660 *Human Genes*. (Princeton University Press, 1994).
- 661 6. Richard, C. *et al.* An mtDNA perspective of French genetic variation. *Ann. Hum.*  
662 *Biol.* **34**, 68–79 (2007).
- 663 7. Dubut, V. *et al.* mtDNA polymorphisms in five French groups: importance of  
664 regional sampling. *Eur. J. Hum. Genet.* **12**, 293–300 (2004).
- 665 8. Ramos-Luis, E. *et al.* Y-chromosomal DNA analysis in French male lineages.  
666 *Forensic Sci. Int. Genet.* **9**, 162–168 (2014).
- 667 9. Karakachoff, M. *et al.* Fine-scale human genetic structure in Western France.  
668 *Eur. J. Hum. Genet.* **23**, 831–836 (2015).
- 669 10. Patterson, N. *et al.* Ancient Admixture in Human History. *Genetics* **192**, 1065–  
670 1093 (2012).
- 671 11. Lazaridis, I. *et al.* Genomic insights into the origin of farming in the ancient Near  
672 East. *Nature* **536**, 419–424 (2016).
- 673 12. Martínez-Cruz, B. *et al.* Evidence of pre-Roman tribal genetic structure in  
674 Basques from uniparentally inherited markers. *Mol. Biol. Evol.* **29**, 2211–22  
675 (2012).
- 676 13. Biagini, S. A. *et al.* People from Ibiza: an unexpected isolate in the Western  
677 Mediterranean. *Eur. J. Hum. Genet.* **27**, 941–951 (2019).
- 678 14. Purcell, S. *et al.* PLINK: a tool set for whole-genome association and population-  
679 based linkage analyses. *Am. J. Hum. Genet.* **81**, 559–75 (2007).

- 680 15. Patterson, N., Price, A. L. & Reich, D. Population structure and eigenanalysis.  
681 *PLoS Genet.* **2**, 2074–2093 (2006).
- 682 16. RStudio Team. RStudio Team (2015). RStudio: Integrated Development for R.  
683 (2015).
- 684 17. R Core Team. R: A Language and Environment for Statistical Computing. R  
685 Foundation for Statistical Computing, Vienna. (2018).
- 686 18. Dray, S. & Dufour, A.-B. The ade4 Package: Implementing the Duality Diagram  
687 for Ecologists. *J. Stat. Softw.* **22**, (2007).
- 688 19. Wickham, H. *ggplot2*. (Springer New York, 2009). doi:10.1007/978-0-387-  
689 98141-3.
- 690 20. Wickham, H. Reshaping Data with the reshape Package. *J. Stat. Softw.* **21**,  
691 (2007).
- 692 21. Kamvar, Z. N., Brooks, J. C. & Grünwald, N. J. Novel R tools for analysis of  
693 genome-wide population genetic data with emphasis on clonality. *Front. Genet.*  
694 **6**, (2015).
- 695 22. Kamvar, Z. N., Tabima, J. F. & Grünwald, N. J. Poppr : an R package for genetic  
696 analysis of populations with clonal, partially clonal, and/or sexual reproduction.  
697 *PeerJ* **2**, e281 (2014).
- 698 23. Alexander, D. H. & Novembre, J. Fast Model-Based Estimation of Ancestry in  
699 Unrelated Individuals. *Genome Res.* **19**, 1655–1664 (2009).
- 700 24. Behr, A. A., Liu, K. Z., Liu-Fang, G., Nakka, P. & Ramachandran, S. pong: fast  
701 analysis and visualization of latent clusters in population genetic data.  
702 *Bioinformatics* **32**, 2817–2823 (2016).
- 703 25. Petkova, D., Novembre, J. & Stephens, M. Visualizing spatial population  
704 structure with estimated effective migration surfaces. *Nat. Genet.* **48**, 94–100  
705 (2016).
- 706 26. O’Connell, J. *et al.* A General Approach for Haplotype Phasing across the Full  
707 Spectrum of Relatedness. *PLoS Genet.* **10**, e1004234 (2014).
- 708 27. Delaneau, O. *et al.* Integrating sequence and array data to create an improved  
709 1000 Genomes Project haplotype reference panel. *Nat. Commun.* **5**, 1–9 (2014).
- 710 28. Lawson, D. J., Hellenthal, G., Myers, S. & Falush, D. Inference of Population  
711 Structure using Dense Haplotype Data. *PLoS Genet.* **8**, e1002453 (2012).
- 712 29. Hellenthal, G. *et al.* A genetic atlas of human admixture history. *Science (80-. )*.  
713 **343**, 747–751 (2014).

- 714 30. Forstenzer, T. R. *French Provincial Police and the Fall of the Second Republic: Social Fear and Counterrevolution*. (Princeton University Press, 2016).
- 715
- 716 31. Sowerwine, C. *France since 1870: Culture, Society and the Making of the Republic*. (Palgrave Macmillan, 2009).
- 717
- 718 32. OECD. *OECD Multi-level Governance Studies Multi-level Governance Reforms Overview of OECD Country Experiences*. (2017).
- 719
- 720 33. House, G. L. & Hahn, M. W. Evaluating methods to visualize patterns of genetic differentiation on a landscape. *Mol. Ecol. Resour.* **18**, 448–460 (2018).
- 721
- 722 34. Novembre, J. *et al.* Genes mirror geography within Europe. *Nature* **456**, 98–101 (2008).
- 723
- 724 35. Lao, O. *et al.* Correlation between Genetic and Geographic Structure in Europe. *Curr. Biol.* **18**, 1241–1248 (2008).
- 725
- 726 36. Leslie, S. *et al.* The fine-scale genetic structure of the British population. *Nature* **519**, 309–314 (2015).
- 727
- 728 37. Hellenthal, G. Instruction Manual for “GLOBETROTTER : a program for identifying , dating and describing admixture events in population data ” for GLOBETROTTER. 1–24 (2015).
- 729
- 730
- 731 38. Calafell, F. & Bertranpetit, J. Principal component analysis of gene frequencies and the origin of Basques. *Am. J. Phys. Anthropol.* **93**, 201–215 (1994).
- 732
- 733 39. Rodríguez-Ezpeleta, N. *et al.* High-density SNP genotyping detects homogeneity of Spanish and French Basques, and confirms their genomic distinctiveness from other European populations. *Hum. Genet.* **128**, 113–117 (2010).
- 734
- 735
- 736 40. Bycroft, C. *et al.* Patterns of genetic differentiation and the footprints of historical migrations in the Iberian Peninsula. *Nat. Commun.* **10**, 551 (2019).
- 737
- 738 41. Pereira, L. *et al.* High-resolution mtDNA evidence for the late-glacial resettlement of Europe from an Iberian refugium. *Genome Res.* **15**, 19–24 (2005).
- 739
- 740 42. Calafell, F. & Bertranpetit, J. A simulation of the genetic history of the Iberian Peninsula. *Curr. Anthropol.* **34**, 735–745 (1993).
- 741
- 742 43. Günther, T. *et al.* Ancient genomes link early farmers from Atapuerca in Spain to modern-day Basques. *Proc. Natl. Acad. Sci. U. S. A.* **112**, 11917–22 (2015).
- 743
- 744 44. Olalde, I. *et al.* The genomic history of the Iberian Peninsula over the past 8000 years. *Science* **363**, 1230–1234 (2019).
- 745
- 746 45. Zuazo, K. *El euskera y sus dialectos*. (Alberdania, 2010).
- 747 46. Koch, J. Breton Migrations. in *Celtic Culture : A Historical Encyclopedia* 275–

- 748 277 (ABC-CLIO, 2005).
- 749 47. Monnier, J. Chapitre 6 : L’immigration bretonne en Armorique. in *Toute*  
750 *l’histoire de Bretagne* (eds. Monnier, J. & Cassard, J.) 97–106 (Skol Vreizh,  
751 1997).
- 752 48. Forster, P. & Toth, A. Toward a phylogenetic chronology of ancient Gaulish,  
753 Celtic, and Indo-European. *Proc. Natl. Acad. Sci.* **100**, 9079–9084 (2003).
- 754 49. Lazaridis, I. *et al.* Ancient human genomes suggest three ancestral populations  
755 for present-day Europeans. *Nature* **513**, 409–413 (2014).
- 756 50. Arias, P. The Origins of the Neolithic Along the Atlantic Coast of Continental  
757 Europe: A Survey. *J. World Prehistory* **13**, 403–464 (1999).
- 758 51. Blumenthal, D. *Alsace-Lorraine: A Study of the Relations of the Two Provinces*  
759 *to France and to Germany, and a Presentation of the Just Claims of Their People*  
760 *(Classic Reprint)*. (Forgotten Books, 2012).
- 761 52. Fine, J. V. A. *The Ancient Greeks: A Critical History*. (Belknap Press: An  
762 Imprint of Harvard University Press, 1985).
- 763 53. 1000 Genomes Project Consortium *et al.* A global reference for human genetic  
764 variation. *Nature* **526**, 68–74 (2015).
- 765 54. Busby, G. B. J. *et al.* The Role of Recent Admixture in Forming the  
766 Contemporary West Eurasian Genomic Landscape. *Curr. Biol.* **25**, 2518–2526  
767 (2015).
- 768
- 769

770 **Main Figures and Tables**

771

|          | Groupings                                     | % Total variance | $\Phi$ -statistics    | p      |
|----------|-----------------------------------------------|------------------|-----------------------|--------|
| <b>A</b> | Variations Between Areas                      | 0.02             | $\Phi_{ST} = 0.0026$  | 0.4605 |
|          | Variations Between Departments Within Areas   | 0.23             | $\Phi_{ST} = 0.0023$  | 0.0009 |
|          | Variations Within Departments                 | 99.73            | $\Phi_{ST} = 0.00027$ | 0.0009 |
| <b>B</b> | Variations Between Regions                    | -0.054           | $\Phi_{ST} = -0.0005$ | 0.7362 |
|          | Variations Between Departments Within Regions | 0.3              | $\Phi_{ST} = 0.003$   | 0.0009 |
|          | Variations Within Departments                 | 99.74            | $\Phi_{ST} = 0.0025$  | 0.0009 |
| <b>C</b> | Variations Between Departments                | 0.26             | $\Phi_{ST} = 0.0026$  | 0.0009 |
|          | Variations Within Departments                 | 99.73            |                       |        |

772

773

774 **Table 1.** Hierarchical analysis of molecular variance (AMOVA). Results for percentage of total variance,  
775  $\Phi$ -statistics, and p-values are reported for the three distinct analyses. **A)** proportion of genetic variation  
776 partitioned among geographic areas, among departments within geographic areas, and within  
777 departments; **B)** proportion of genetic variation partitioned among regions, among departments within  
778 regions, and within departments; **C)** proportion of genetic variation partitioned among departments and  
779 within departments



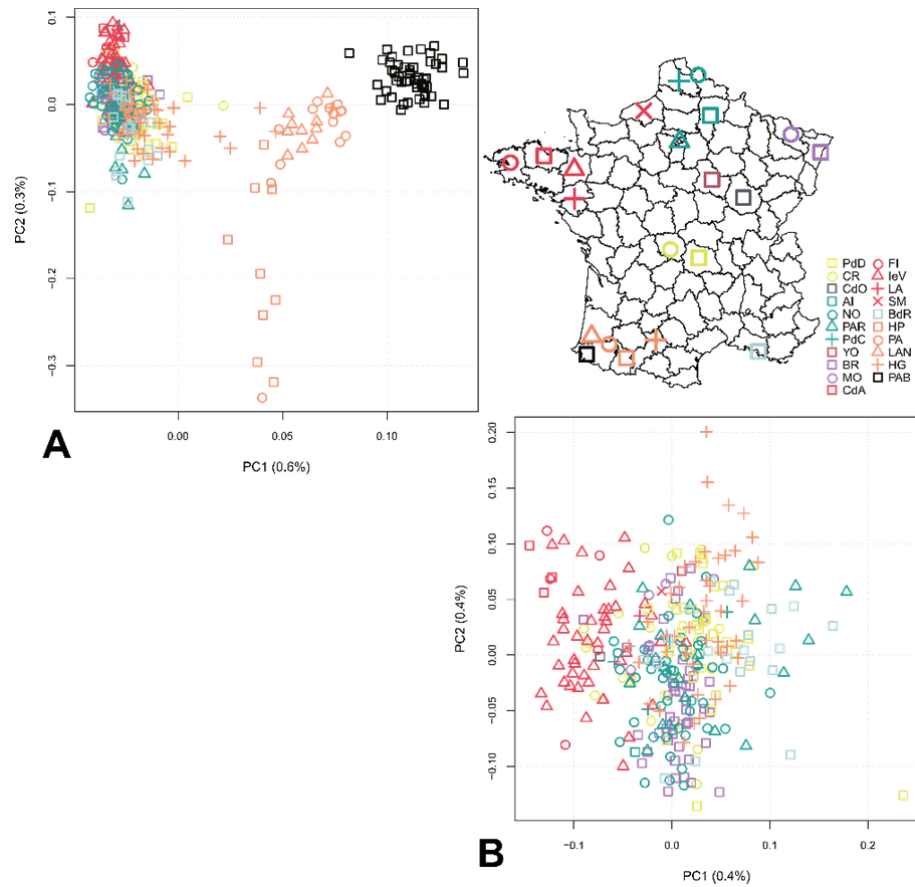

780

781

782

783

784

**Figure 1.** Principal Component Analysis of French samples (dataset A) with **A**) Basque and Gascon samples, and **B**) without them. Colors correspond to distinct geographic areas, while different symbols with the same color represent distinct departments in each area (See map distribution). However, Basques are colored differently than the non-Basque-speaking samples from that same area, but symbols recall the departments they share with the non-Basque-speaking groups.

785

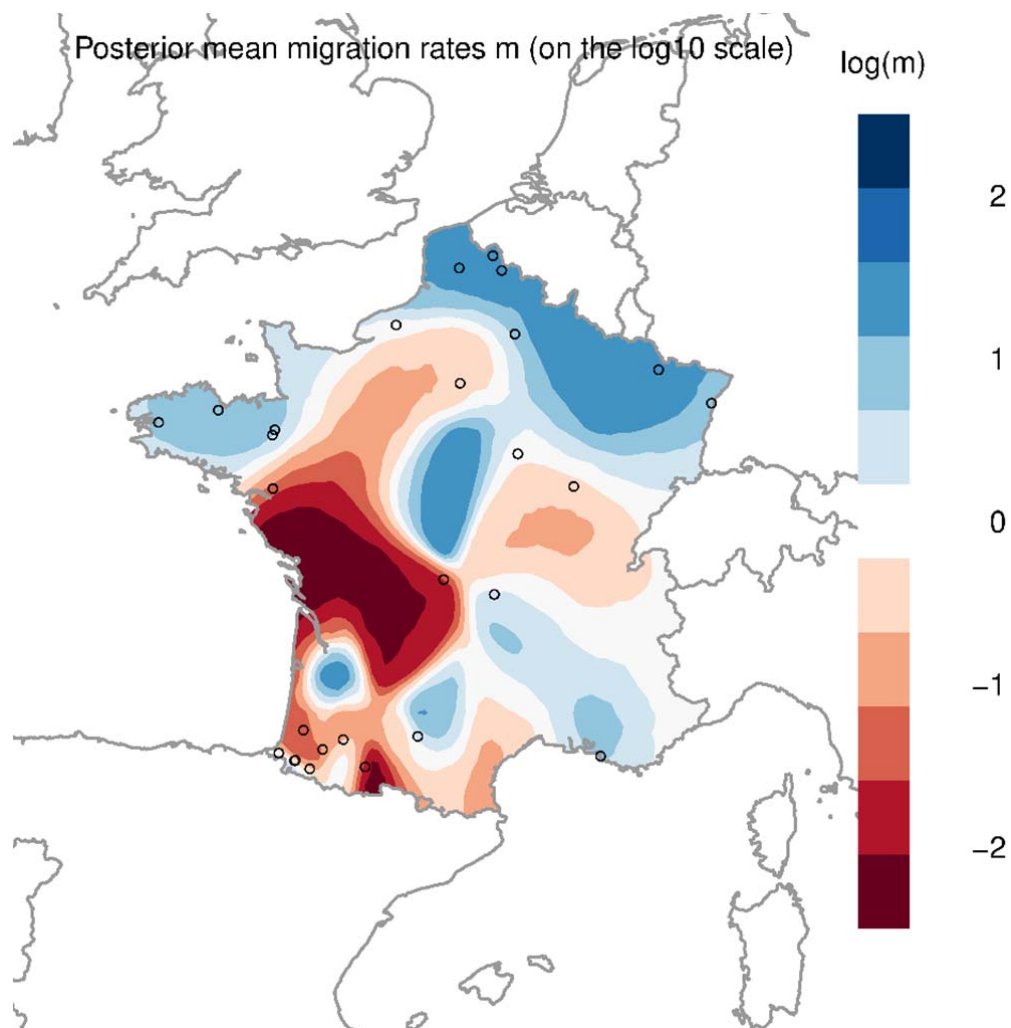

786

787 **Figure 2.** EEMS plot based on 395 French samples (Dataset A). Different shades of the same color  
788 represent differential levels of high (blue) or low (red) effective migration rates. The zero value indicates  
789 the average effective migration rate. Geographical locations for the different departments are averages of  
790 the coordinates among samples.

791

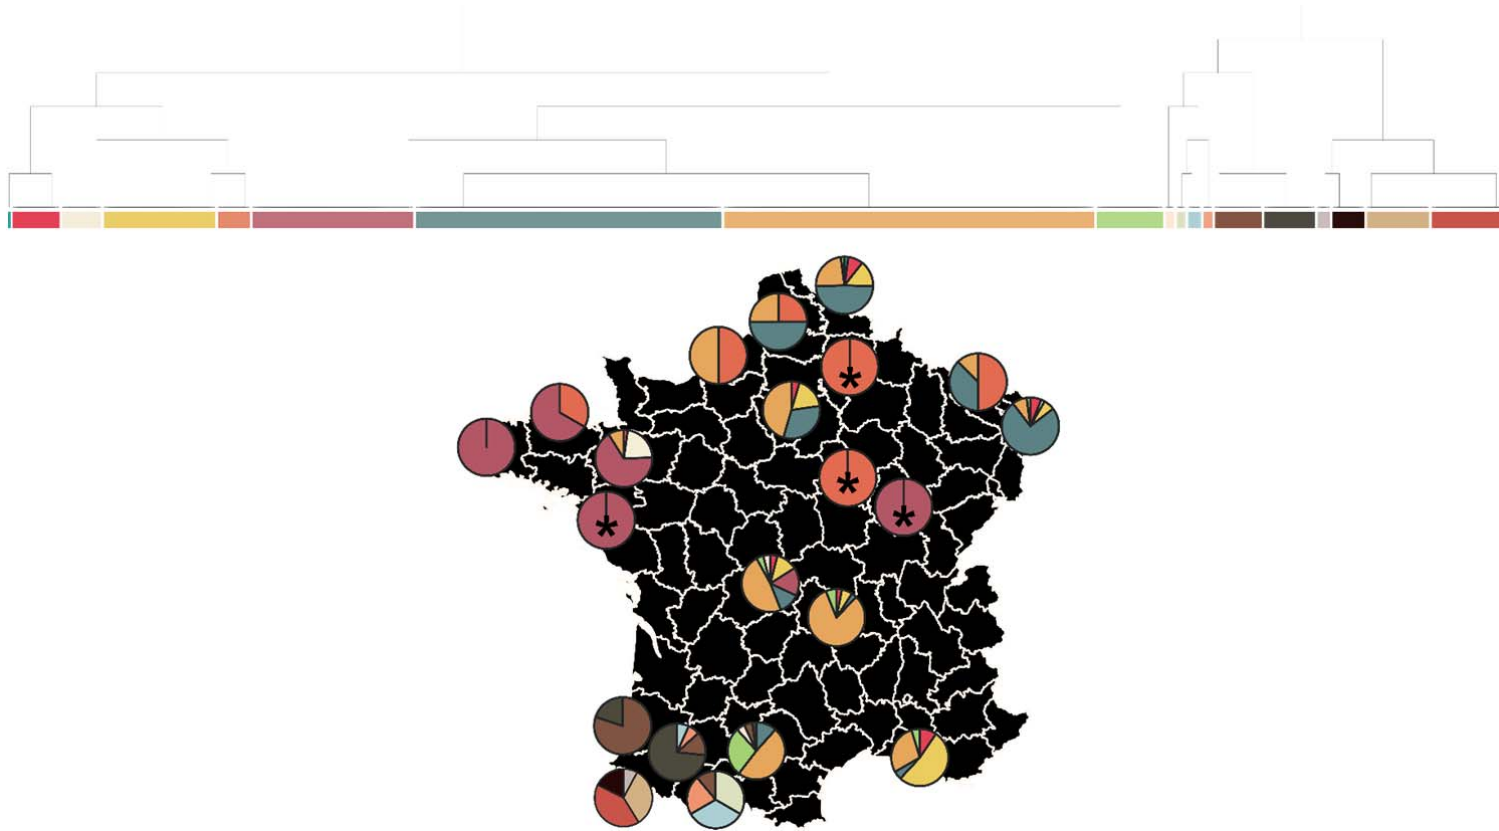

792

793

794 **Figure 3.** Pie charts showing the spatial distribution of haplotypes inferred by the fineSTRUCTURE tree. Each pie chart is a department, while colors correspond to the

795 haplotypes described in the tree above the map. See Figure 1 for department names. Asterisks indicate departments with only one sample.

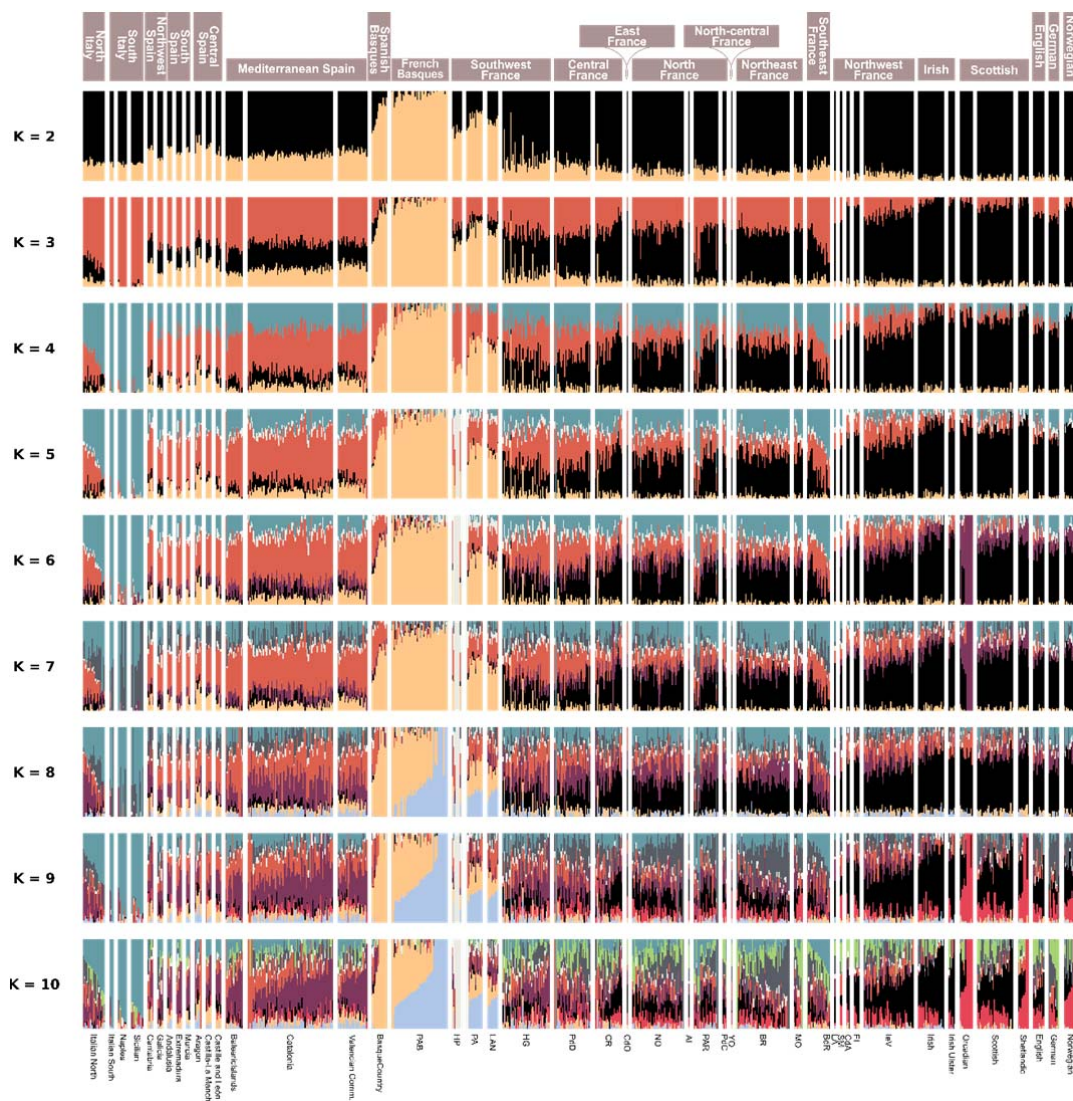

796 **Figure 4.** ADMIXTURE results from K=2 to K=10 for the 395 French samples (Dataset A) divided in  
 797 nine major groups, and 12 groups representing external sources from surrounding countries; the lowest  
 798 cross-validation error was found with K=2.  
 799

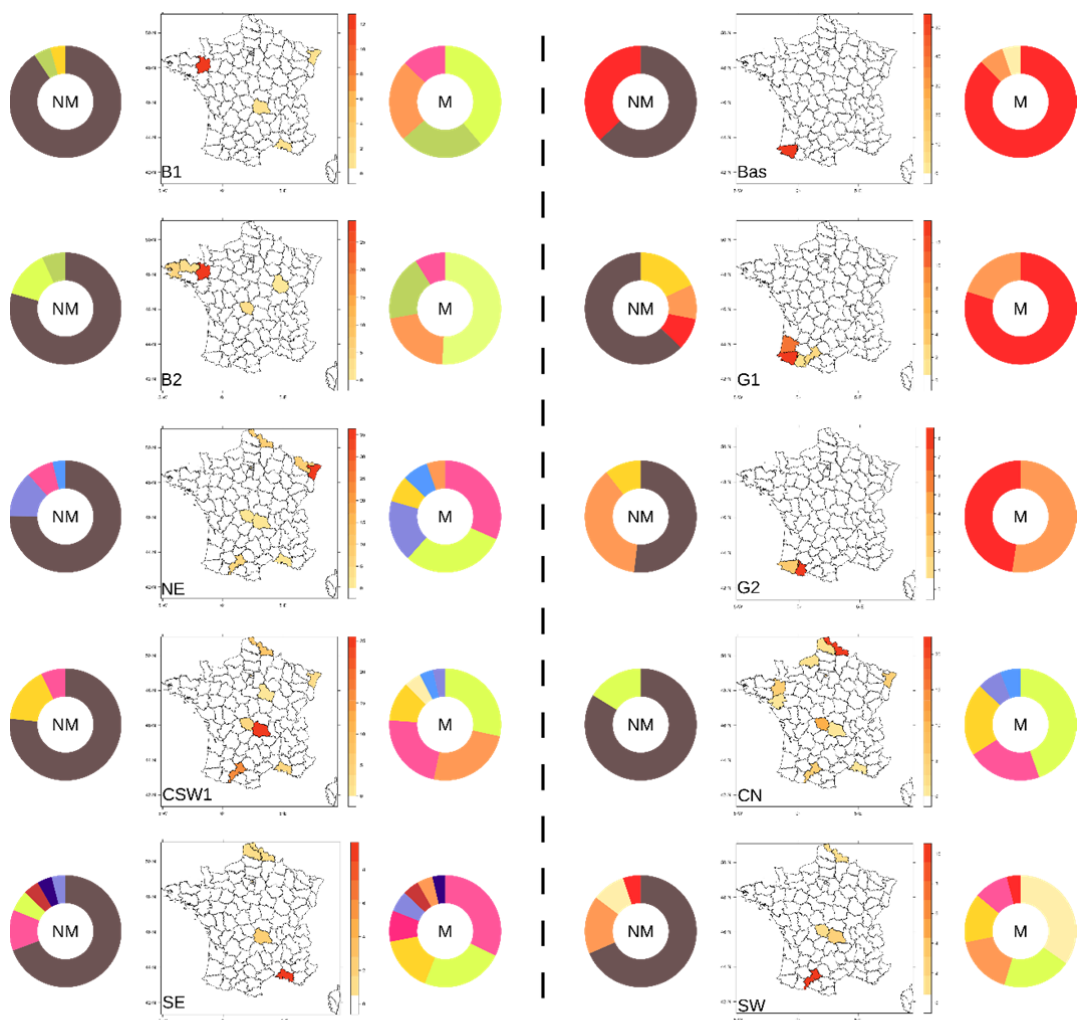

800  
801  
802  
803  
804  
805  
806  
807  
808  
809

**Figure 5.** Ancestry profiles for 10 French targets. Each map is a target defining a specific major area of the French territory. On the left of each map, the donut chart is representing the ancestry profile for the not masked analysis (NM); on the right the same analysis has been masked (M). The different colors represent proportions of haplotype sharing with a specific source (only contributions above the 2.5% are shown); sources are defined in supplementary Figure 8. In the NM analysis, the brown color refers to contributions coming from other French groups (cumulative value). Target names stand for: B1 and B2, Brittany; NE, NorthEast; CSW1, Central-SouthWest; SE, SouthWest; Bas, Basques; G1 and G2, Gascons; CN, Central-North; SW, SouthWest.

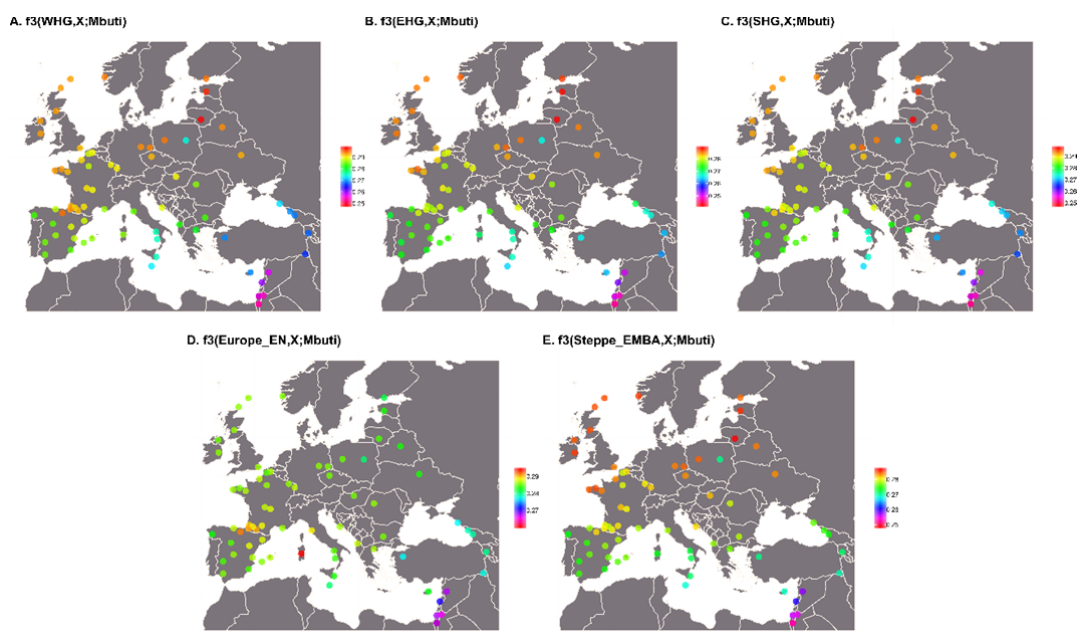

810

**Figure 6.** Maps showing the distribution of the shared drift between different ancestral populations and the modern ones (X in the f3 statistics). Panels: **A)** f3(Western Hunter Gatherers,X;Mbuti), **B)** f3(Eastern Hunter Gatherers,X;Mbuti), **C)** f3(Scandinavian Hunter Gatherers,X;Mbuti), **D)** f3(Europe\_Early Neolithic ,X;Mbuti), **E)** f3(Steppe Early Middle Bronze Age,X;Mbuti). In France, departments with less than two individuals are not shown.

811

812

813

814

815

816

817

818

819

820

821

822

823

824

825

826

827 **Supplementary Data**

828

829

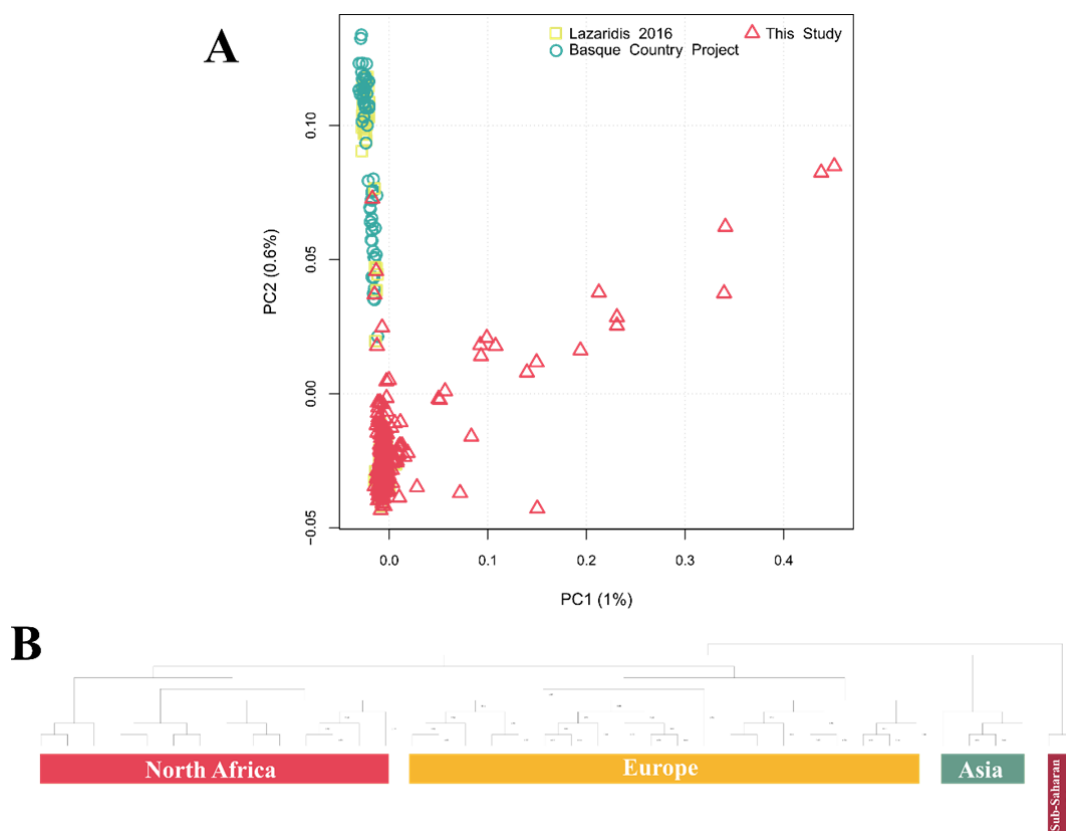

830

831 **Supplementary Figure 1.** PCA with 415 French samples highlighted the presence of outliers clearly

832 skewing the global distribution of the samples (A). We assessed the origin of those samples using

833 ChromoPainter and fineSTRUCTURE in the context of external references from three worldwide

834 populations (CEU, YRI, CHB) from the 1000 genomes project<sup>53</sup> and North African samples from

835 published data<sup>11</sup>. Four clusters were defined (B), assigning the majority of our samples (395) to the

836 European cluster. The remaining 20 were outliers mainly belonging to the North African cluster (16

837 samples), 2 samples each were instead assigned to the Asian and the Sub-Saharan African clusters.

838

839

840

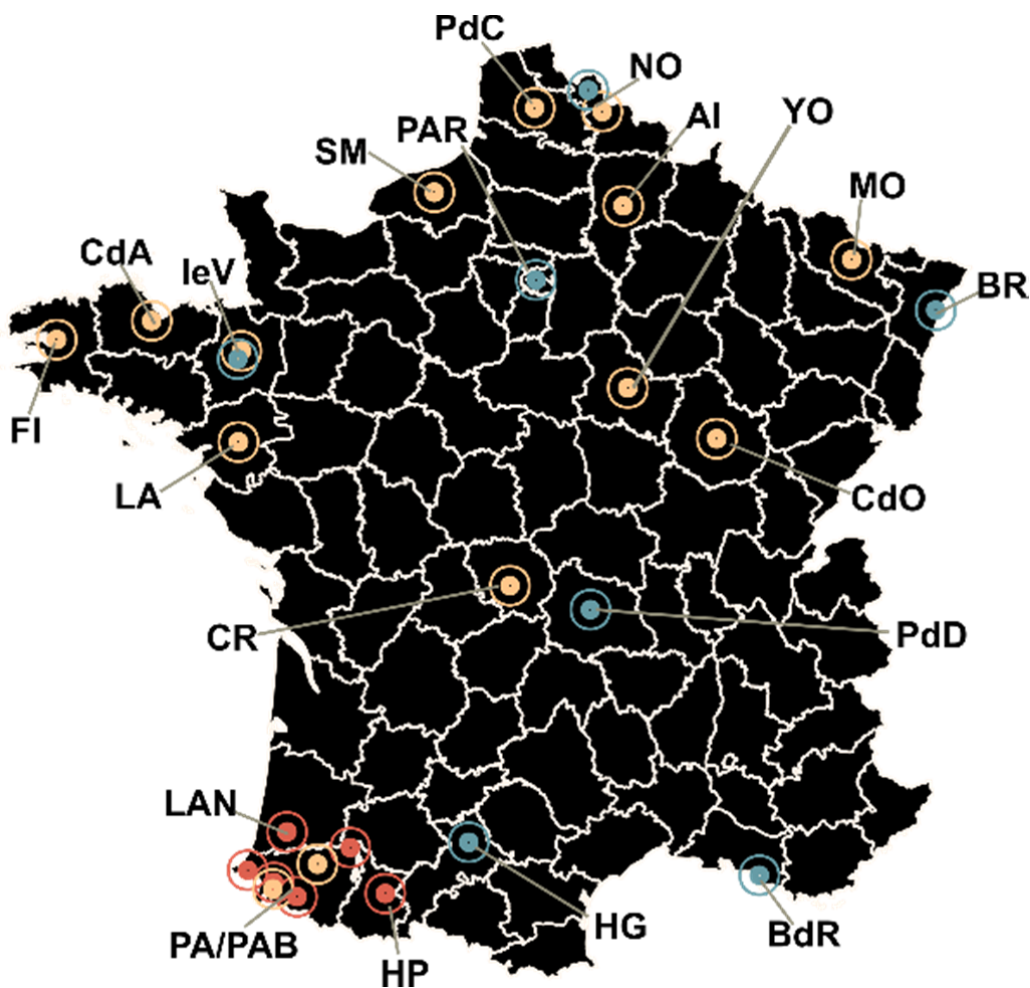

841

842

843

844 **Supplementary Figure 2.** Map showing sample distribution among the different departments.

845 Geographical coordinates are averages among samples. Different colors define the three datasets used in  
846 this work (blue dots correspond to the 256 samples genotyped for this work; yellow dots correspond to  
847 the 79 samples from Lazaridis et al., 2016; red dots correspond to the 60 samples from unpublished data).

848 Sample size and acronyms for the departments are: PdD, Puy-de-Dôme (33); CR, Creuse (25); CdO,  
849 Côte-d'Or (1); AI, Aisne (1); NO, Nord (47); PdC, Pas-de-Calais (4); PAR, Paris (22); YO, Yonne (1);  
850 MO, Moselle (8); BR, Bas-Rhin (48); IeV, Ille-et-Vilaine (45); CdA, Côtes-d'Armor (3); FI, Finistère (5);  
851 SM, Seine-Maritime (2); LA, Loire-Atlantique (1); BdR, Bouches-du-Rhône (21); LAN, Landes (10);  
852 HG, Haute-Garonne (43); PA, Pyrénées-Atlantiques (15); PAB, Pyrénées-Atlantiques Basque (31); HP,  
853 Hautes-Pyrénées (29).

854

855



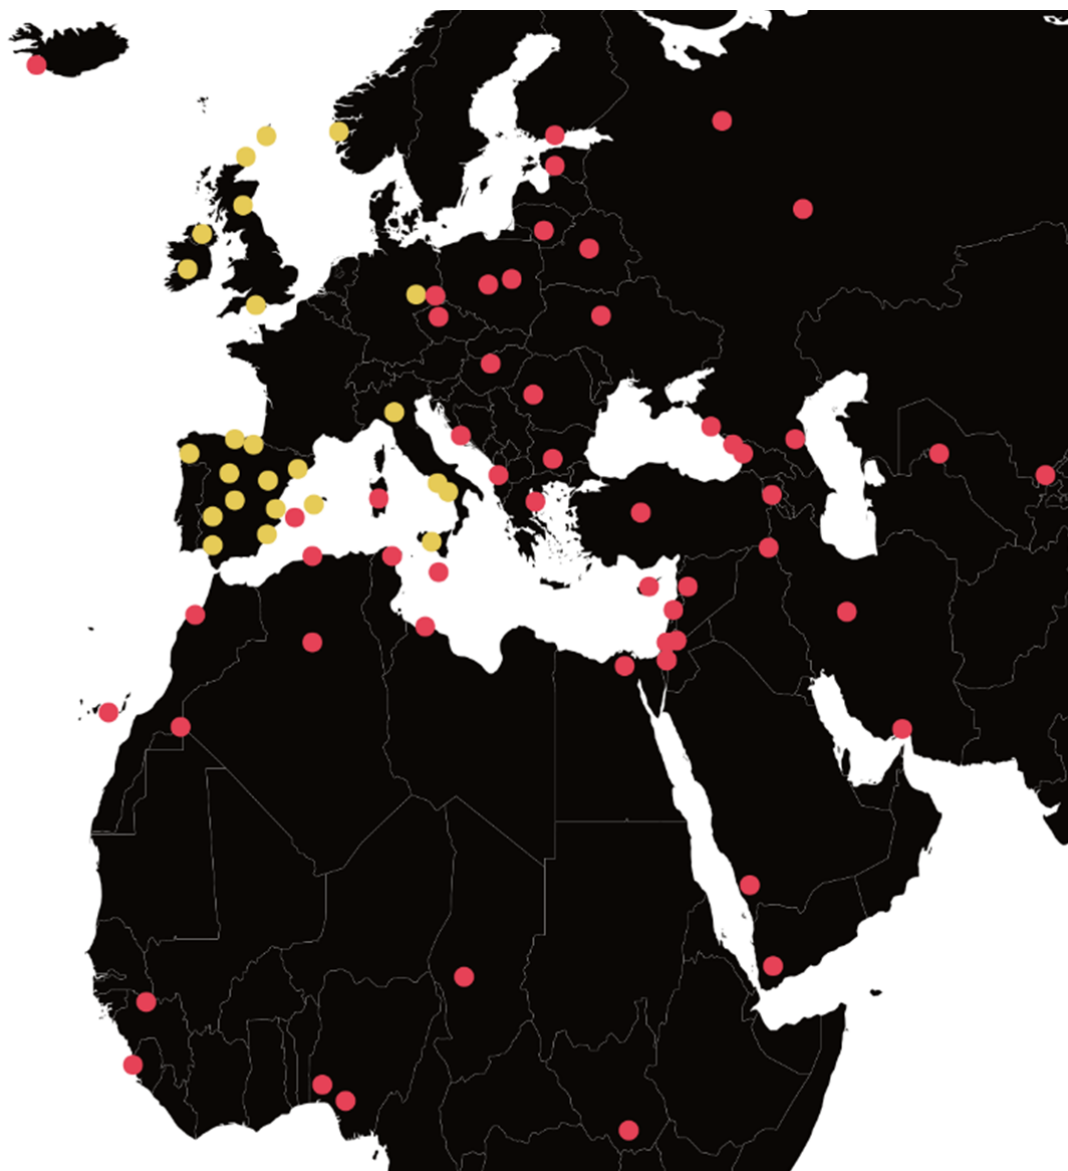

856  
857

858 **Supplementary Figure 3.** External group distribution. Average geolocation points for the 79 external  
859 populations are displayed. Yellow dots refer to the 333 samples included in the allele frequency analyses.  
860 Yellow and red points together represent the 1132 samples used in the haplotype-based analyses

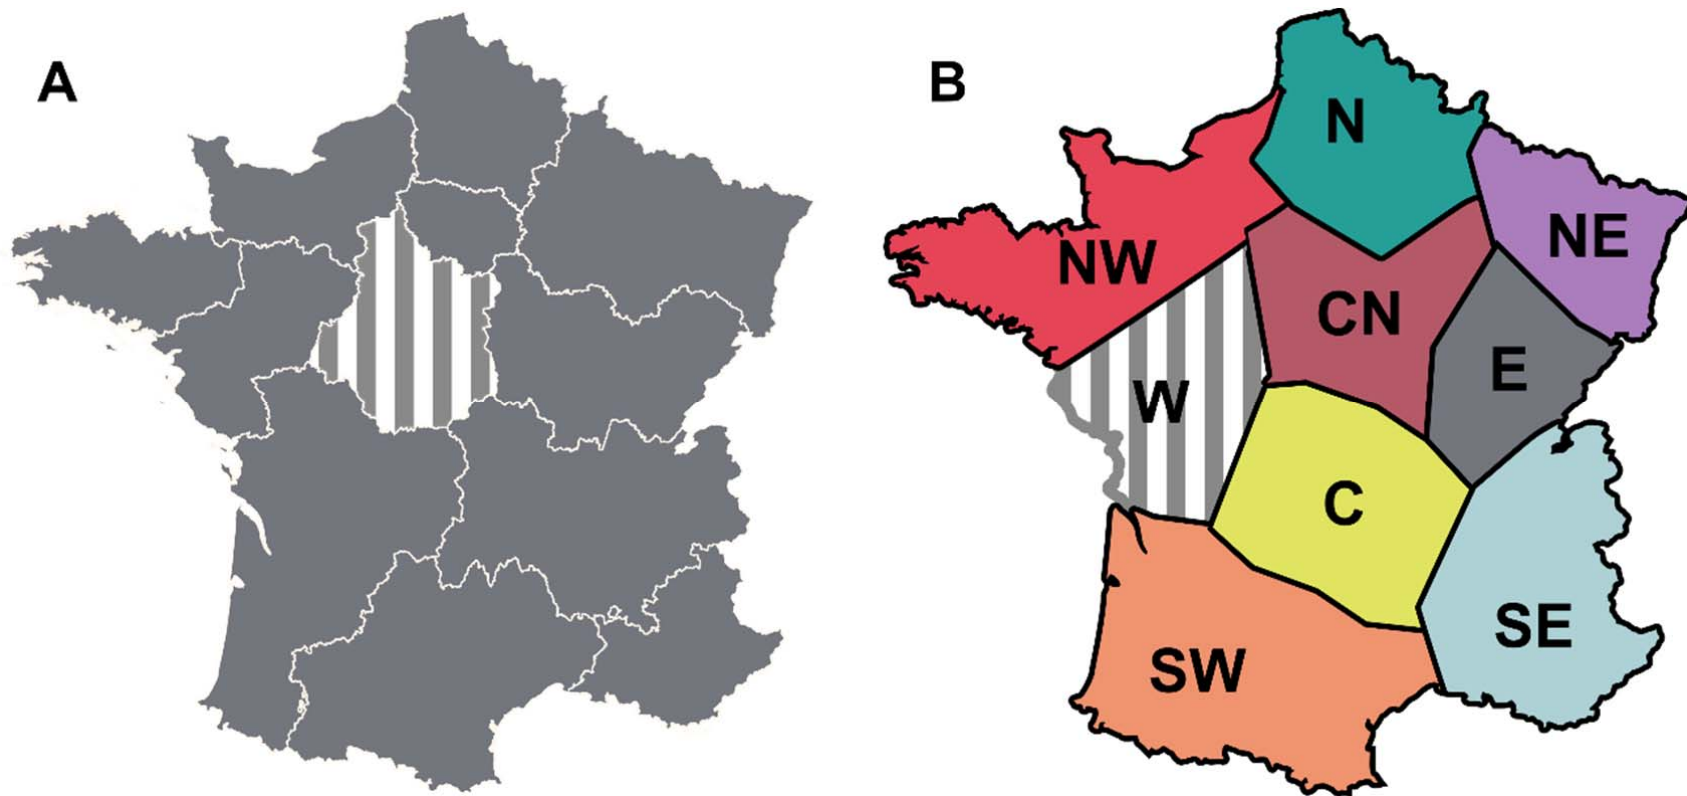

861

**Supplementary Figure 4.** Higher hierarchical levels used in the AMOVA analysis for **A**) Regions and **B**) Areas. Grey vertical lines highlight unsampled zones. Acronyms for the Areas are: NW, Northwest; N, North; NE, Northeast; W, West; CN, Central North; E, East; C, Center; SW, Southwest; SE, Southeast.

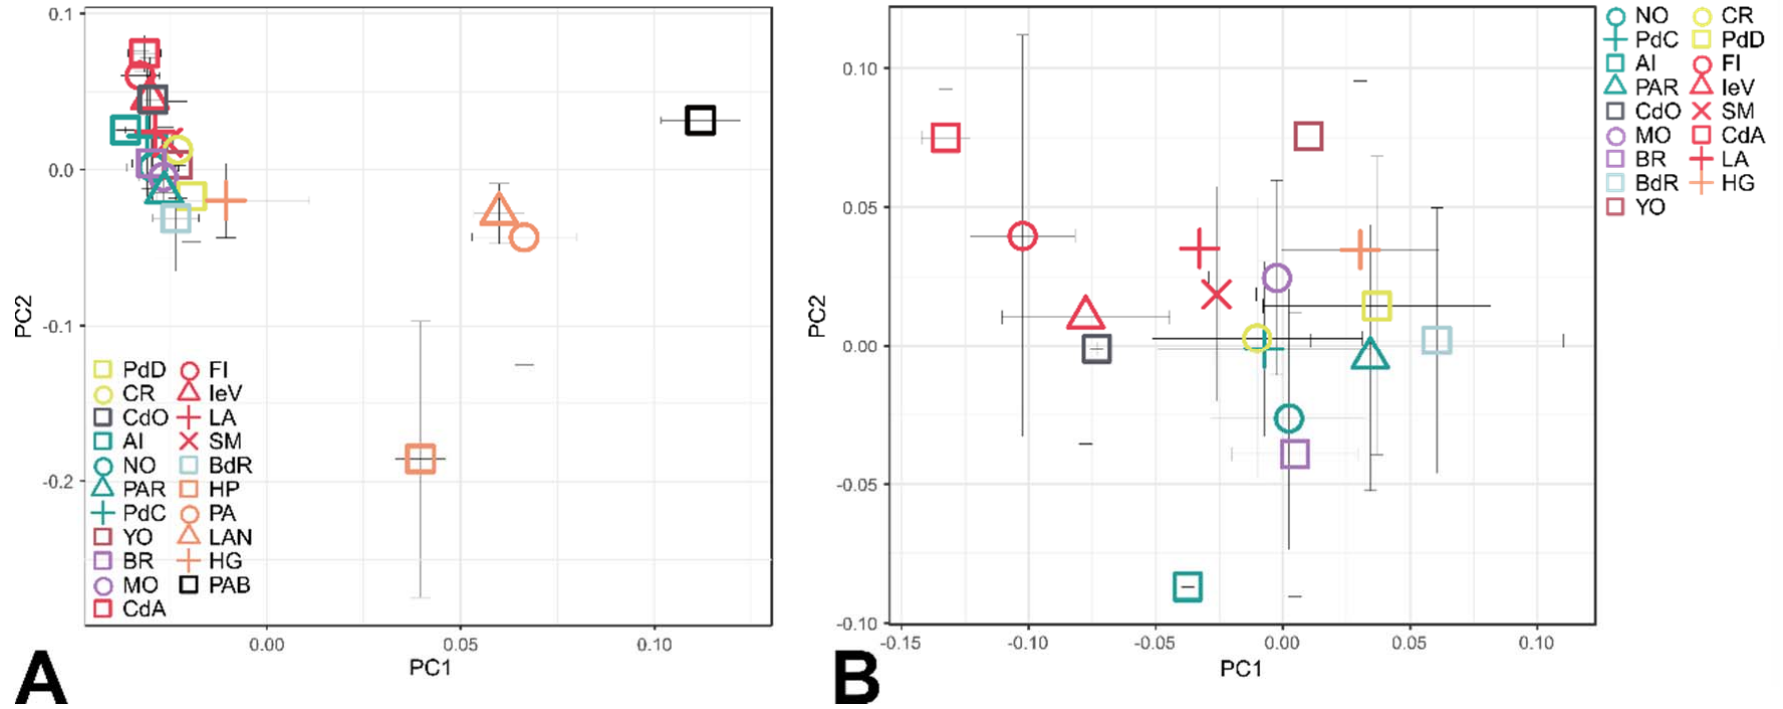

862  
863

864

865

866

867

**Supplementary Figure 5.** Averaged Principal Component Analysis with **A)** Basque and Gascon samples, and **B)** without them. Color and symbol codes are the same as in main Figure 2. For each group, each averaged eigenvalue is represented along with standard deviation bars for the two PCs.

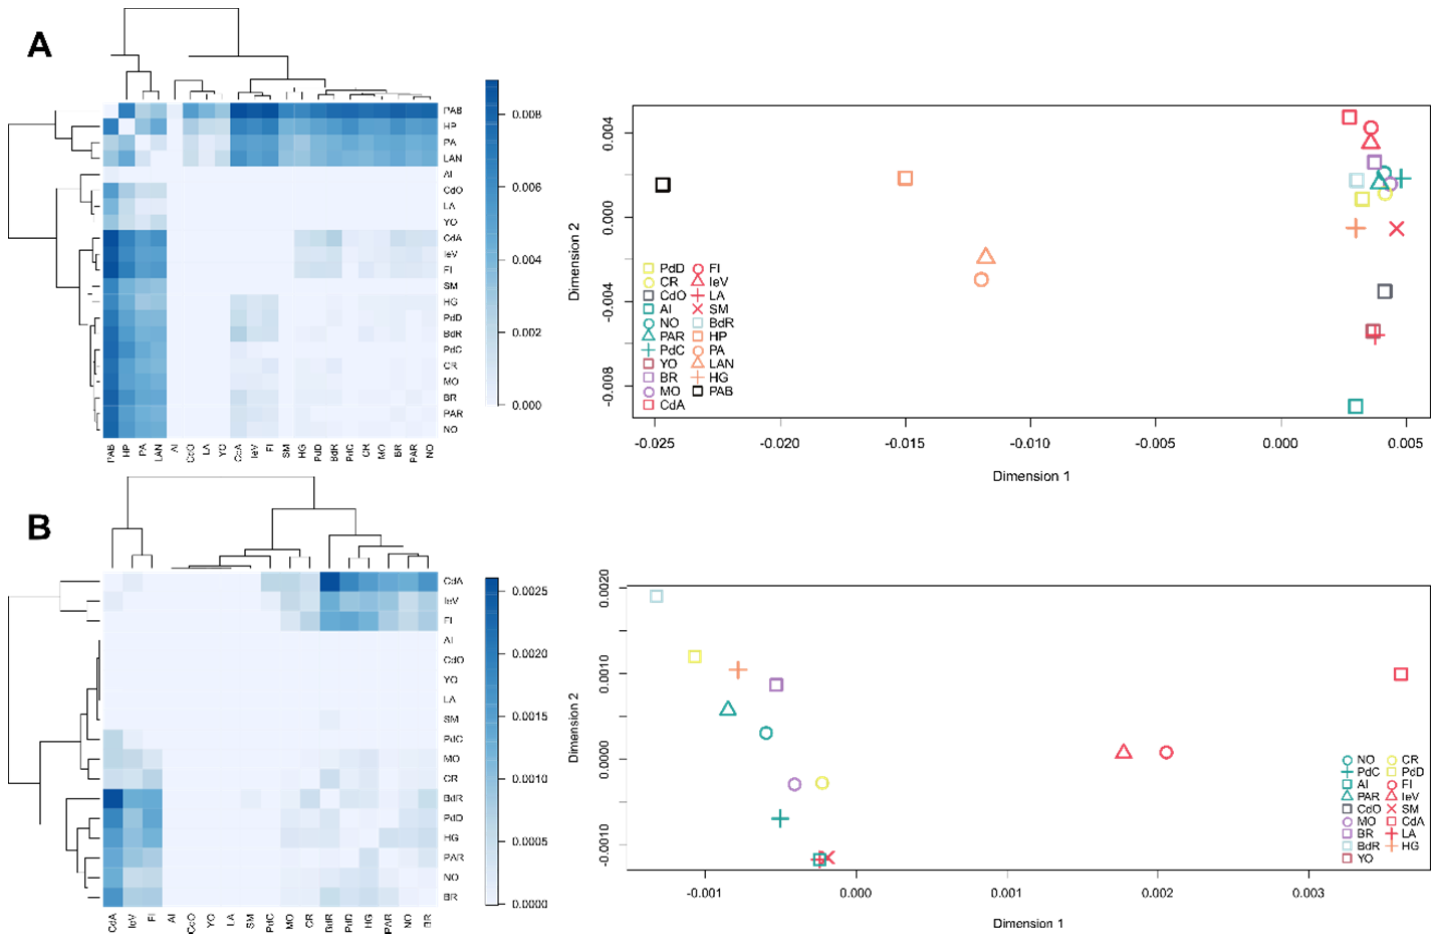

868

869

870

**Supplementary Figure 6.** On the left: heatmap and dendrogram based on  $F_{ST}$  matrices **A**) with the Basque and Gascon samples and **B**) without them. On the right: Multidimensional scaling (MDS) based on  $F_{ST}$  values **A**) with the Franco-Cantabrian samples and **B**) without them.

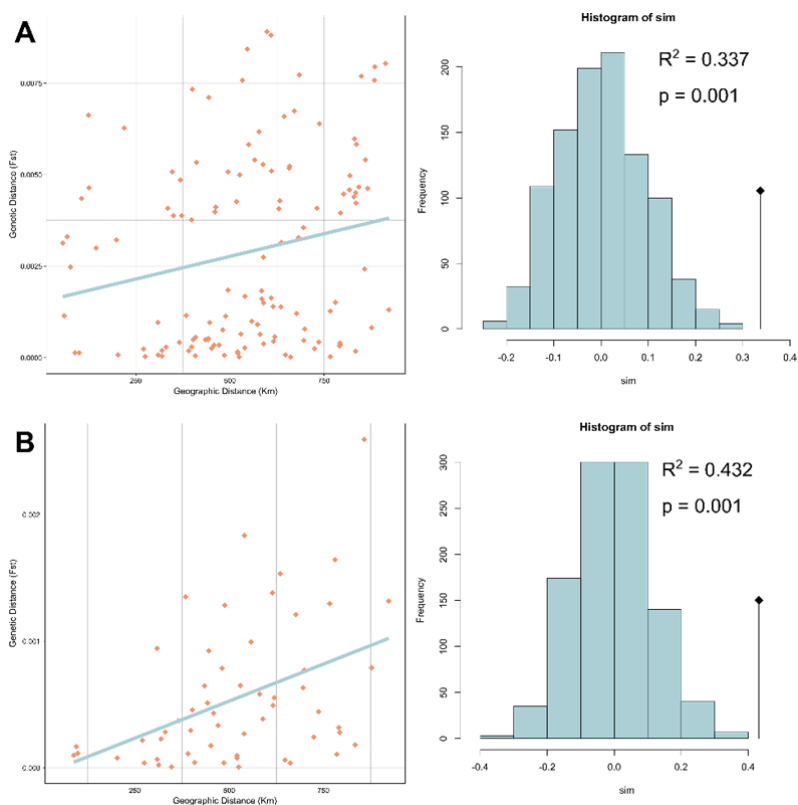

871 **Supplementary Figure 7.** Mantel test of isolation by distance between the genetic ( $F_{ST}$ ) and geographic  
872 (in Km) distances **A**) with the Basque and Gascon samples and **B**) without them.  $R^2$  scores and p-values  
873 are within each figure.

874

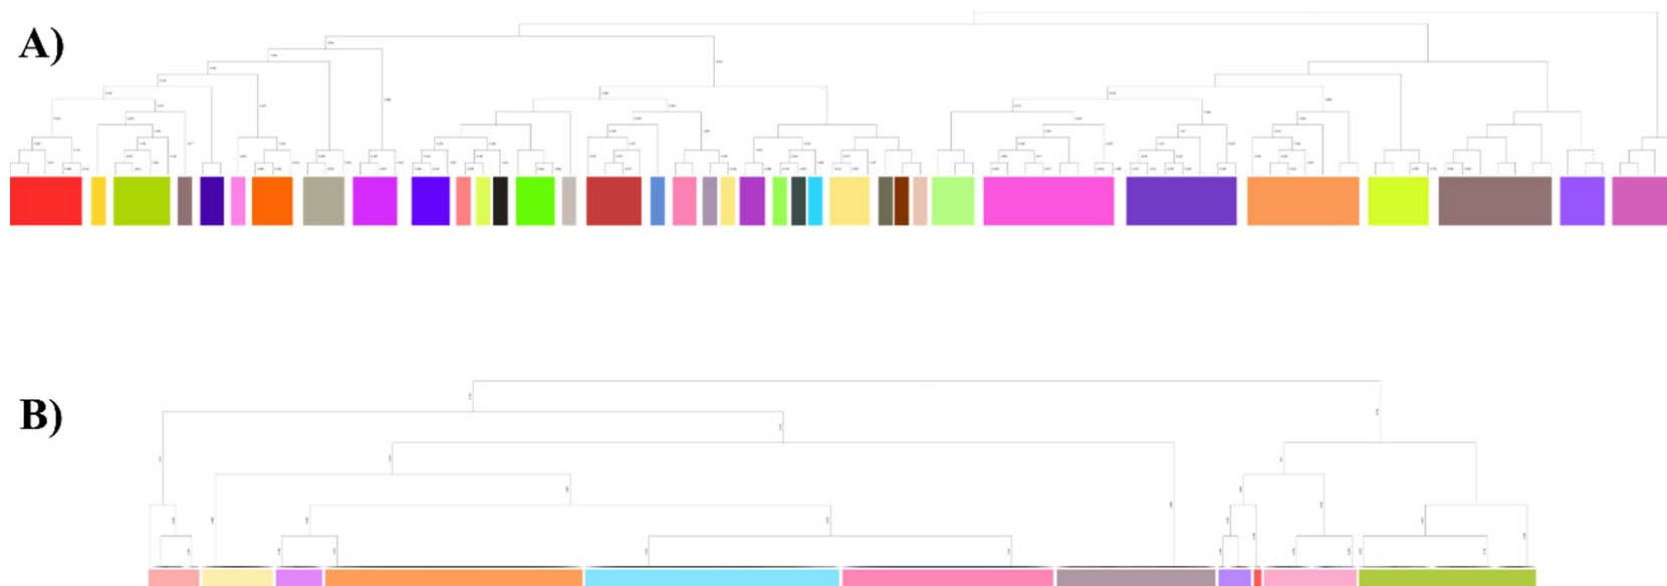

875 **Supplementary Figure 8. A)** 35 clusters detected for the external samples when France was silenced in the rerun of CromoPainter and fineSTRUCTURE. **B)** 11 clusters  
876 detected within France using the “force file” option (-F) in fineSTRUCTURE.

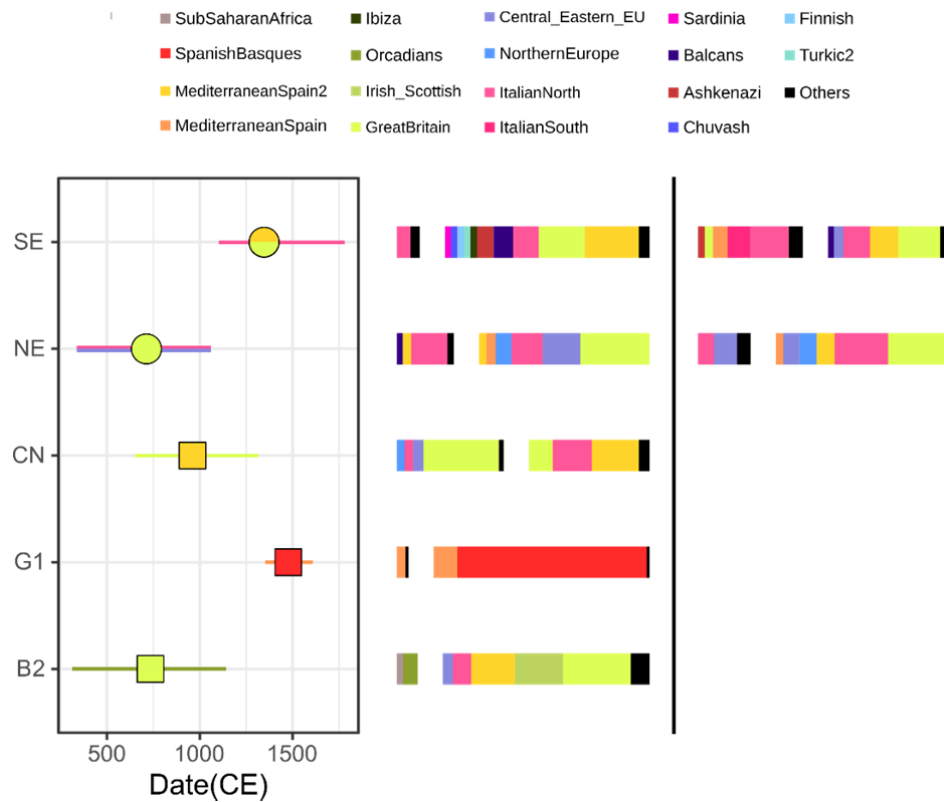

877  
878

**Supplementary Figure 9.** Dating results for 5 French targets according to the M analysis in GLOBETROTTER. In the left panel, squares refer to one-date, circles to one-date-multiway. The internal color refers to the highest surrogate's value of the major source, while the color of the CI bars corresponds to the highest surrogate's value of the minor source. Sources are represented as horizontal bars on the right side and are separated by a white space (together the sources account for the 100% of the values). In the one-date-multiway cases, two different sets of sources are presented and, where needed, both colors are represented for major and minor sources. Dates have been calculated as  $1950 - (g * N)$  where  $g=28$  years and  $N$  is the calculated number of generations in the GLOBETROTTER analysis.

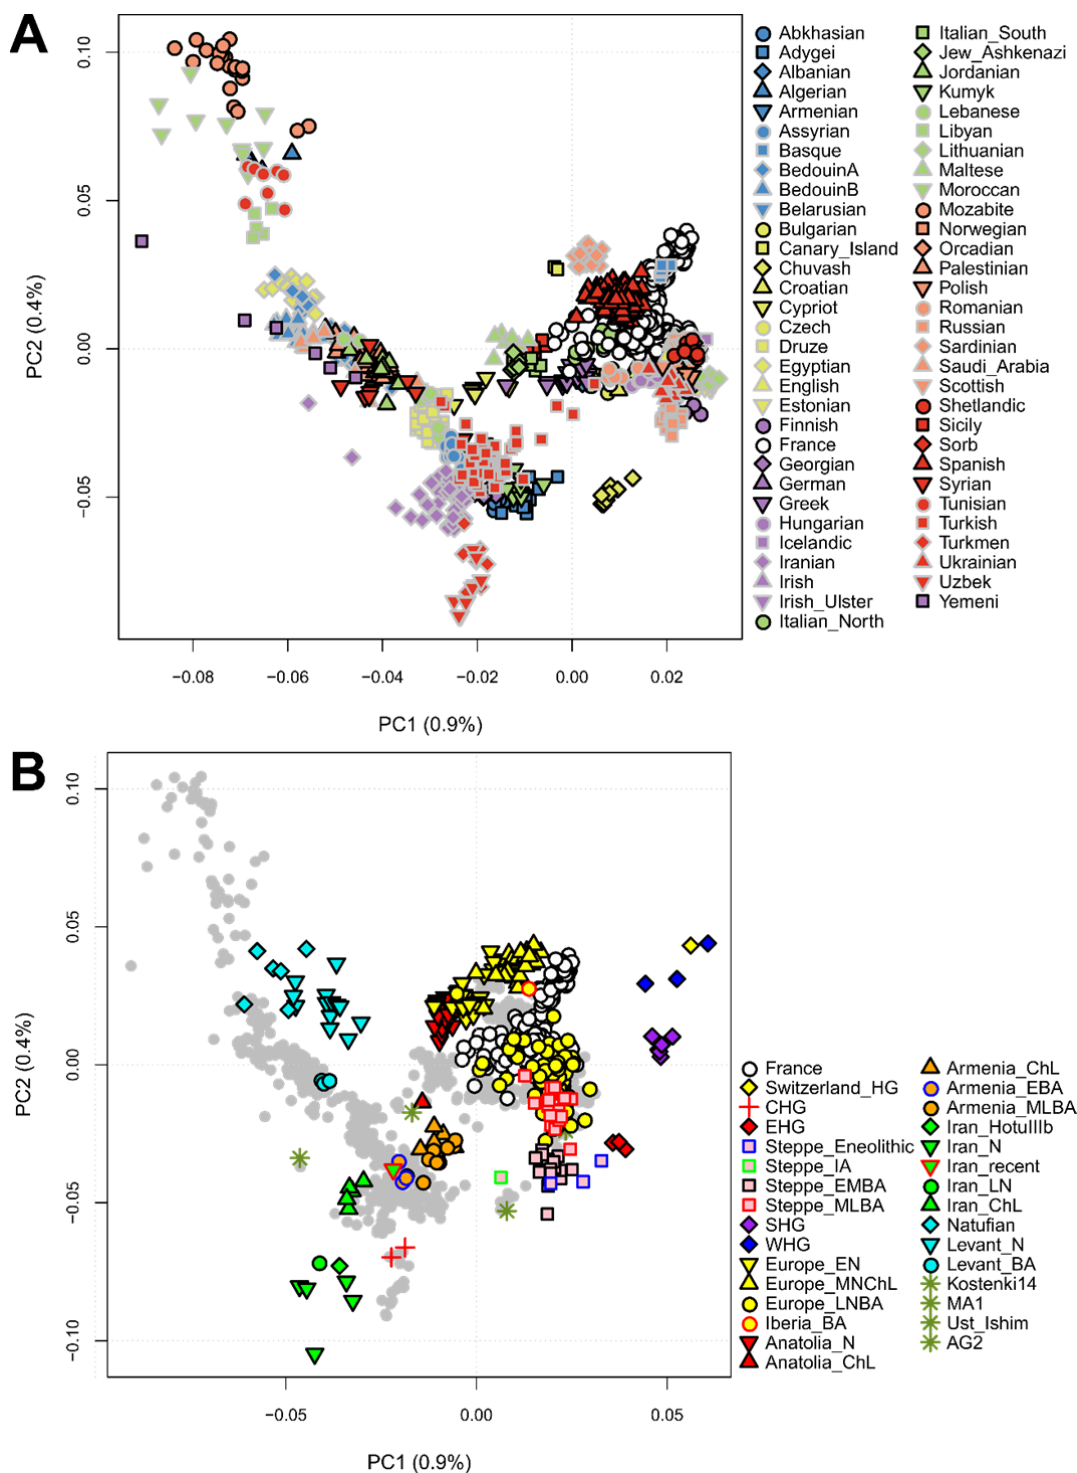

**Supplementary Figure 10.** Principal component analysis with dataset D. **A)** Only modern samples; **B)** Projection of ancestral populations from different periods on top of the modern samples (grey dots; among the modern populations, only France is distinguishable as white circles).



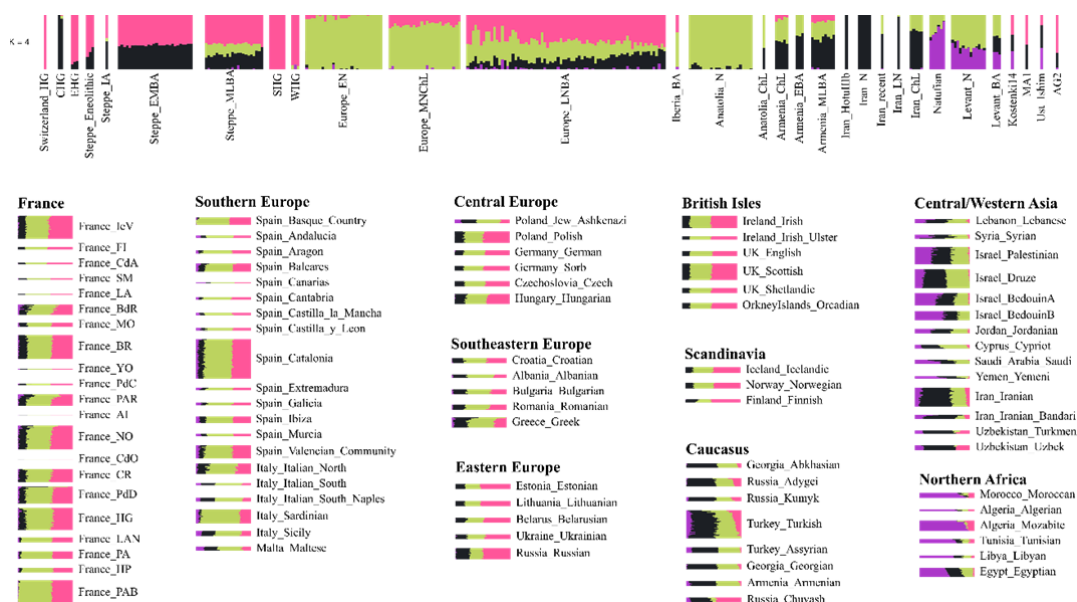

**Supplementary Figure 11.** ADMIXTURE results for K=4 ancestral components using dataset D. Results for the ancient samples are on the top of the figure. Below, modern samples are organized according to major geographical groupings.

879

| Dataset | Samples                        | Analysis                           | N° of SNPs        |
|---------|--------------------------------|------------------------------------|-------------------|
| A       | <b>395</b>                     | Allele frequency / Haplotype-based | 142,803 / 343,884 |
| B       | <b>728</b> (395 + 333)         | Allele frequency                   | 154,889           |
| C       | <b>1527</b> (728 + 799)        | Haplotype-based                    | 380,697           |
| D       | <b>1687</b> (1527 - 122 + 282) | Allele frequency                   | 163,631           |

880 **Supplementary Table 1.** Summary of the dataset composition; both number of samples and number of  
881 variants are reported according to the analysis the dataset was used for.

882
